1 ORIGINAL ARTICLE

2

3

4 **CXCR3-expressing myeloid cells recruited to the hypothalamus protect**  
5 **against diet-induced body mass gain and metabolic dysfunction**

6

7 Natalia F. Mendes<sup>1,2</sup>, Ariane M. Zanesco<sup>2</sup>, Cristhiane F. Aguiar<sup>3</sup>, Gabriela F. Rodrigues-Luiz<sup>4</sup>,  
8 Dayana C. da Silva<sup>2</sup>, Jonathan F. Campos<sup>2</sup>, Niels O. S. Câmara<sup>5</sup>, Pedro M. M. de Moraes-Vieira<sup>3</sup>,  
9 Eliana P. de Araújo<sup>2,6,#</sup>, Licio A. Velloso<sup>2,7,\*,#</sup>

10

11 <sup>1</sup>School of Medical Sciences, Department of Translational Medicine (Section of Pharmacology),  
12 University of Campinas, Brazil.

13 <sup>2</sup>Laboratory of Cell Signaling, Obesity and Comorbidities Research Center, University of  
14 Campinas, Brazil.

15 <sup>3</sup>Laboratory of Immunometabolism, Institute of Biology - University of Campinas, Brazil.

16 <sup>4</sup> Department of Microbiology, Immunology and Parasitology, Federal University of Santa  
17 Catarina, Brazil.

18 <sup>5</sup>Laboratory for Transplantation Immunobiology, Institute of Biomedical Sciences, University of  
19 Sao Paulo, Brazil.

20 <sup>6</sup>Faculty of Nursing, University of Campinas, Brazil.

21 <sup>7</sup>National Institute of Science and Technology on Neuroimmunomodulation, Rio de Janeiro,  
22 Brazil.

23

24

25

26 \* Corresponding Authors:

27 Licio A. Velloso. Electronic address: [lavellos@unicamp.br](mailto:lavellos@unicamp.br)

28 Natalia F. Mendes. Eletronic address: [natalia.mendess@gmail.com](mailto:natalia.mendess@gmail.com)

29 Laboratory of Cell Signaling-Obesity and Comorbidities Research Center, University of  
30 Campinas, 13083-864 Campinas, Brazil

31

32 # EPA and LAV contributed equally as supervisors of this study

33

34

35

36 **Abstract**

37 Microgliosis is an important component of diet-induced hypothalamic inflammation in obesity.  
38 A few hours after the introduction of a high-fat diet, the mediobasal hypothalamus resident  
39 microglia undergo morphological and functional changes toward an inflammatory phenotype.  
40 If the consumption of large amounts of dietary fats persists for long periods, bone marrow-  
41 derived myeloid cells are recruited and integrated into a new landscape of hypothalamic  
42 microglia. However, it is currently unknown what are the transcriptional signatures and specific  
43 functions exerted by either resident or recruited subsets of hypothalamic microglia. Here, the  
44 elucidation of the transcriptional signatures revealed that resident microglia undergo only  
45 minor changes in response to dietary fats; however, under the consumption of a high-fat diet,  
46 there are major transcriptional differences between resident and recruited microglia with a  
47 major impact on chemotaxis. In addition, in recruited microglia, there are major transcriptional  
48 differences between females and males with an important impact on transcripts involved in  
49 neurodegeneration and thermogenesis. The chemokine receptor CXCR3 emerged as one of the  
50 components of chemotaxis with the greatest difference between recruited and resident  
51 microglia, and thus, was elected for further intervention. The hypothalamic  
52 immunoneutralization of CXCL10, one of the ligands for CXCR3, resulted in increased body  
53 mass gain and reduced energy expenditure, particularly in females. Furthermore, the chemical  
54 inhibition of CXCR3 resulted in a much greater change in phenotype with increased body mass  
55 gain, reduced energy expenditure, increased blood leptin, glucose intolerance, and reduced  
56 insulin. Thus, this study has elucidated the transcriptional differences between resident and  
57 recruited hypothalamic microglia in diet-induced obesity, identifying chemokines as a relevant  
58 subset of genes undergoing regulation. In addition, we showed that a subset of recruited  
59 microglia expressing CXCR3 has a protective, rather than a detrimental role in the metabolic  
60 outcomes promoted by the consumption of a high-fat diet, thus, establishing a new concept in  
61 obesity-associated hypothalamic inflammation.

62

63 Keywords: Hypothalamus, obesity, monocytes, microglia, chemokines.

64

65

66

## 67 Introduction

68 Obesity affects over 600 million people worldwide and projections are pessimistic indicating  
69 that over a billion people will be diagnosed with obesity by the year 2030 (worldobesity.org).  
70 Obesity develops as a consequence of a chronic state of anabolism in which caloric intake  
71 overcomes energy expenditure [1]. Both, experimental and human studies have indicated that,  
72 at least in part, the chronic anabolic state leading to obesity develops as a consequence of a  
73 defective hypothalamic regulation of whole-body energy balance [2] [3] [4].

74 Experimental studies have shown that the consumption of large amounts of saturated fats  
75 triggers an inflammatory response in the hypothalamus affecting the function of key neurons  
76 involved in the regulation of food intake, energy expenditure, and systemic metabolism [5] [6]  
77 [7] [8]. In addition, human studies using magnetic resonance imaging have identified  
78 hypothalamic gliosis in adults and children with obesity, providing clinical evidence for the  
79 existence of an obesity-associated hypothalamic inflammation [4] [9] [10]. Microglia are key  
80 cellular components of this inflammatory response undergoing structural and functional  
81 changes that develop early after the introduction of a high-fat diet (HFD) [11] [12] [13] [14].  
82 Distinct strategies used to inhibit hypothalamic microglia resulted in impaired diet-induced  
83 hypothalamic inflammation, increased leptin sensitivity, reduced spontaneous caloric intake,  
84 and improved systemic glucose tolerance [12] [15]. Thus, elucidating the mechanisms involved  
85 in the regulation of microglial response to dietary factors may provide an advance in the  
86 definition of the pathophysiology of obesity, and potentially identify new targets for  
87 interventions aimed at treating obesity and its metabolic comorbidities [16] [17] [18].

88 Resident microglia are derived from the yolk sac primitive hematopoietic cells and populate the  
89 neuroepithelium at embryonic day 9.5 [19]. Under baseline conditions, in the absence of  
90 infections, trauma, or other types of potentially harmful stimuli, resident microglia remain  
91 rather quiescent; however, under stimulus, they undergo rapid morphological and functional  
92 changes aimed at confronting the threat [20]. In the hypothalamus, differently from most parts  
93 of the brain, resident microglia are responsive to fluctuations in the blood levels of nutrients  
94 and hormones involved in metabolic control, such as leptin [12]. Thus, a simple meal can  
95 promote considerable changes in hypothalamic resident microglia indicating the involvement  
96 of these cells in the complex network of cells that regulate whole body metabolism [21]. Under  
97 the consumption of a nutritionally balanced diet, meal-induced changes in hypothalamic  
98 resident microglia are cyclic and completely reversible [21]. However, under consumption of an  
99 HFD, microglia present profound changes in morphology and function; moreover, upon  
100 prolonged consumption of this type of diet, there is recruitment of bone marrow-derived  
101 myeloid cells that will compose a new landscape of hypothalamic microglia [12] [15] [18].  
102 Despite the considerable advance in the understanding of how hypothalamic microglia are  
103 involved in diet-induced obesity (DIO), the transcriptional landscapes of resident and recruited  
104 microglia are currently unknown; and, the specific functions of either subset of microglia  
105 remain elusive.

106 In this study, we first elucidated the transcriptional differences between resident and recruited  
107 hypothalamic microglia in DIO, identifying chemokines as a relevant subset of genes  
108 undergoing regulation. Next, we identified a subset of recruited microglia expressing CXCR3,  
109 which exerts a protective role against DIO.

110

## 111 Results

112 *Elucidating the transcriptional signatures of hypothalamic resident and recruited microglia in*  
113 *diet-induced obesity.* Double reporter mice were obtained by the crossing of CX3CR1<sup>GFP</sup> and  
114 CCR2<sup>RFP</sup> (Fig. 1a). At the age of 8 weeks, female and male mice were randomly selected for  
115 either chow or HFD feeding for 28 days, and then specimens were harvested for analysis (Fig.  
116 1b). In flow cytometry, cells expressing CCR2 could not be detected in the hypothalamus of  
117 mice fed on chow (Fig. 1c), whereas in the white adipose tissue, virtually all cells expressing  
118 CX3CR1 were also expressing CCR2 (Fig. 1c). Conversely, in both female and male mice fed on  
119 HFD, CCR2 cells accounted for approximately 10% of hypothalamic microglia (Fig. 1d).  
120 Histological analysis confirmed the results obtained by flow cytometry (Fig. 1e); furthermore, it  
121 was shown that CD169, which is classically regarded as a marker of bone marrow-derived cells  
122 [22], is expressed both in resident as well as in recruited microglia (Fig. 1f), confirming data  
123 published elsewhere [18]. Next, to prepare the samples for RNA sequencing, we sorted  
124 hypothalamic microglia expressing either CX3CR1 or CCR2 (Fig. 2a). The quality of sorting was  
125 confirmed by determining positivity for CX3CR1 (Fig. 2b) and CCR2 (Fig. 2c), and also by  
126 determining the positivity for several markers of resident microglia (Fig. 2d-2m) and several  
127 markers of bone marrow-derived cells (Fig. 2n-2x). The elucidation of the transcriptional  
128 landscapes of CX3CR1 and CCR2 revealed that either diet or sex exerted only minor differences  
129 in the expression of transcripts in CX3CR1 cells (Fig. 3a-3b); nevertheless, sex exerted major  
130 differences in CCR2 cells (Fig. 3a-3b). The direct comparisons between CX3CR1 and CCR2  
131 obtained from mice fed on the HFD revealed the vast differences in the transcriptional  
132 landscapes of either female (Fig. 3c) or male (Fig. 3d) mice. Furthermore, the direct  
133 comparisons between female and male mice revealed a considerable degree of sexual  
134 dimorphism in the transcriptional landscapes of recruited CCR2 cells (Fig. 3e). In CX3CR1 cells,  
135 the consumption of the HFD impacted on IL17, lipids, toll-like receptor signaling, tumor  
136 necrosis factor signaling and chemokines (Fig. 4a); whereas in CCR2 cells, the consumption of  
137 the HFD impacted on lipids, toll-like receptor signaling, tumor necrosis factor signaling,  
138 chemokines, neurotrophins signaling, reactive oxygen species, thermogenesis, and pathways  
139 related to neurodegeneration (Fig. 4a). Next, we asked what functions related to chemotaxis  
140 were predominantly regulated in CCR2 cells of mice fed on the HFD (Fig. 4b-4c). As cell  
141 chemotaxis emerged as an important function in both females (Fig. 4b) and males (Fig. 4c), we  
142 looked with greater detail into the expression of chemokines and chemokine receptors (Fig.  
143 4d). Virtually all the transcripts evaluated showed diametrically opposite expression between  
144 CX3CR1 and CCR2 (Fig. 4d).

145 *Cxcr3 is highly expressed in recruited microglia.* As we were particularly interested in identifying  
146 factors involved in the recruitment of CCR2 to the hypothalamus, we evaluated cytokine  
147 receptors with high expression in CCR2 and low expression in CX3CR1. As depicted in Fig. 5,  
148 Ccr3 (Fig. 5a), Ccr7 (Fig. 5b), Ccr8 (Fig. 5c), Cxcr2 (Fig. 5d), Cxcr3 (Fig. 5e), Cxcr4 (Fig. 5f), Cxcr5  
149 (Fig. 5g), Cxcr6 (Fig. 5h) and Cxcr7 (Fig. 5i) were all expressed in CCR2 cells and virtually absent  
150 from CX3CR1 cells. Cxcr3 (Fig. 5e) and Cxcr6 (Fig. 5h) presented the highest expressions, and  
151 therefore, we performed a search for previous studies looking at either of these chemokine  
152 receptors in the context of DIO hypothalamic inflammation. Using the terms, hypothalamus,  
153 hypothalamic, obesity, inflammation, Cxcr3, and Cxcr6, we could find no prior publications. As  
154 Cxcr3 is involved in interferon-gamma (IFN- $\gamma$ ) induction [23], and IFN- $\gamma$  is expressed in the  
155 context of DIO hypothalamic inflammation [5], we looked into the IFN- $\gamma$ -related pathways  
156 regulated in recruited microglia (Fig. 6). First, we asked if the canonical ligands for CXCR3,  
157 CXCL9, CCL10, and CXCL11, were expressed in either CX3CR1 or CCR2 cells. CXCL11 was not

158 detected in either cell type (not shown). CXCL9 (Fig. 6a) was expressed in CX3CR1 cells, only,  
159 whereas CXCL10 (Fig. 6b) was expressed in both CX3CR1 and CCR2 cells. In addition, in both  
160 female and male mice, *Ifng* was expressed in CCR2, but not in CX3CR1 cells (Fig. 6c).  
161 Furthermore, IFN- $\gamma$  pathways were shown to be modulated in both female (Fig. 6d) and male  
162 (Fig. 6e) CCR2 cells. Thus, we elected CXCR3 as a target for further intervention.

163 *The immunoneutralization of hypothalamic CXCL10 leads to increased body mass gain in*  
164 *female mice.* As an attempt to interfere with CXCR3 actions in CCR2 cells, we targeted one of its  
165 ligands, CXCL10. As depicted in Fig. 7a, mice were submitted to two intracerebroventricular  
166 (icv) injections of an anti-CXCL10 antibody aimed at immunoneutralizing the target protein in  
167 the hypothalamus. As a result of the immunoneutralization of CXCL10, there were smaller  
168 numbers of CCR2-positive cells in the hypothalamus of both female and male mice fed on an  
169 HFD (Fig. 7b). However, there were no major changes in the numbers of CXCR3-expressing cells  
170 in the hypothalamus of either female (Fig. 7c) or male (Fig. 7d) mice fed on an HFD. This was  
171 accompanied by no changes in the transcript levels of *Cxcr3* and several other chemokine-  
172 related transcripts (Fig. 7c-7d), except for a trend to decrease *Cxcl11* and an increase of *Cxcr4*  
173 in females (Fig. 7c); and a decrease of *Cxcl10* and a trend to increase *Cx3cl1* in males (Fig. 7d).  
174 Nevertheless, the immunoneutralization of hypothalamic CXCL10 (Fig. 8 and Fig. 9) resulted in  
175 increased body mass gain (Fig. 8a-8b), a trend to reduce blood triglycerides (Fig. 8f), reduced  
176 blood cholesterol (Fig. 8g), reduced expression of *Agrp* transcript in the hypothalamus (Fig. 8k),  
177 a trend to reduce blood insulin (Fig. 8n), trends to reduce *Il1b* and *Il6* transcripts in the  
178 hypothalamus (Fig. 8o), and a trend to reduce respiratory quotient (Fig. 8s) during the dark  
179 cycle in female mice. Conversely, in male mice (Fig. 9), the inhibition of hypothalamic CXCL10  
180 had only a minor effect, leading to a trend to reduce hypothalamic *Npy* (Fig. 9k), a trend to  
181 reduce hypothalamic *Il1b*, and a trend to increase hypothalamic *Il6* (Fig. 9o).

182 *The inhibition of CXCR3 worsens body mass gain and the metabolic phenotype of mice fed on a*  
183 *high-fat diet.* CXCR3 was inhibited using a pharmacological antagonist, AMG487 [24] (Fig. 10a).  
184 The intervention resulted in the reduction of CCR2 (Fig. 10b) and CXCR3 (Fig. 10c-10d) cells in  
185 the hypothalamus of both female and male mice fed an HFD. In addition, there was a reduction  
186 of *Ccl2* and an increase of *Cx3cl1* transcripts in the hypothalamus of females (Fig. 10e), and a  
187 reduction of *Ccl2* transcripts in the hypothalamus of male (Fig. 10f) mice fed an HFD. The  
188 inhibition of CXCR3 had a major impact on metabolic phenotype; thus, in female mice fed an  
189 HFD, there was an increase in body mass gain (Fig. 11a-11b), a trend to increase brown adipose  
190 tissue mass (Fig. 11c), a trend to increase blood leptin (Fig. 11e), an increase in blood  
191 triglycerides (Fig. 11f), a trend to reduce hypothalamic *Pomc* (Fig. 11k), an increase in  
192 hypothalamic *Npy* (Fig. 11k), a worsen glucose tolerance (Fig. 11l), increased fasting blood  
193 glucose (Fig. 11m), reduced blood insulin (Fig. 11n), and reduction of *Il6* and *Tlr4* transcripts in  
194 the hypothalamus (Fig. 11o). In males, the inhibition of CXCR3 promoted an increased body  
195 mass gain (Fig. 12a-12b), increased white adipose tissue mass (Fig. 12d), increased blood leptin  
196 (Fig. 12e), increased hypothalamic *Npy* and *Mch* (Fig. 12k), and reduced hypothalamic *Tnfa* and  
197 *Nlrp3* (Fig. 12o).

198

## 199 Discussion

200 In this study, we elucidated the transcriptional landscapes of resident and recruited microglia in  
201 the hypothalamus of mice. We showed that resident microglia undergo minor transcriptional  
202 changes when mice are fed an HFD; however, there are vast differences when confronting

203 resident versus recruited microglia transcriptomes. Moreover, there is a considerable degree of  
204 sexual dimorphism in the transcriptomes of recruited microglia in mice fed an HFD. Upon  
205 exploration of the differences between resident and recruited microglia, we identified the  
206 chemokine receptor *Cxcr3* as an interesting candidate for intervention as it was highly  
207 expressed in recruited cells. The inhibition of CXCR3 resulted in increased body mass gain,  
208 worsening of glucose intolerance, and increased expression of hypothalamic *Npy*. Thus, the  
209 study is the first to identify a subset of recruited microglia that has a protective role against the  
210 deleterious outcomes of DIO, therefore establishing a new concept in obesity-associated  
211 hypothalamic inflammation.

212 Early studies in this field have shown that dietary fats, particularly long-chain saturated fatty  
213 acids, trigger an inflammatory response in the MBH that emerges a few hours after the  
214 introduction of an HFD and progresses to chronicity if the consumption of the HFD persists for  
215 long [5] [6] [7]. Microglia play an important role in this inflammatory response, and studies  
216 have shown that during a prolonged consumption of an HFD, there is recruitment of bone  
217 marrow-derived cells to compose a new hypothalamic microglia landscape [9] [15] [18].  
218 However, it was previously unknown what are the transcriptional signatures of hypothalamic  
219 resident and recruited microglia in DIO.

220 To elucidate the transcriptional landscapes of resident and recruited microglia, we initially  
221 prepared a double reporter mouse for CX3CR1 and CCR2. CX3CR1 encodes for fractalkine  
222 receptor and is highly expressed in resident microglia [25]. The creation of CX3CR1 reporter  
223 mice was regarded as an important step toward the characterization of resident microglia, and  
224 several studies in the field employ this model [26] [27]. Conversely, CCR2 is expressed only in  
225 bone marrow-derived cells and is regarded as a good marker for studying recruited microglia  
226 [25] [28]. The quality of our model was proven good as makers of resident microglia were  
227 present in CX3CR1 cells, only, whereas markers of recruited microglia were present in CCR2  
228 cells, only. Moreover, as previously described, we could find no CCR2 cells in the hypothalamus  
229 of mice fed chow [14] [18].

230 The first important, and previously unknown finding emerged from the comparison of the  
231 transcriptomes of resident microglia in mice fed chow versus mice fed an HFD. In females,  
232 there were only 34 transcripts undergoing significant changes between the two dietary  
233 conditions, whereas in males, the number was greater, 412, but still quite small considering the  
234 whole transcriptome of resident microglia [29]. In a study evaluating the single-cell  
235 transcriptomics of hypothalamic cells, the consumption of an HFD resulted in minor changes in  
236 the so-called macrophage-like cells [30]; however, the detailed transcriptional landscape of  
237 these cells was not explored in depth, so it is uncertain if it contained both resident and  
238 recruited microglia. In an experimental model of Alzheimer's disease, which evaluated male  
239 and female mice, there were hippocampal resident microglial transcriptional changes of the  
240 same magnitude as the one we found in the hypothalamus, affecting approximately 300 genes  
241 [31]. In an experimental model of cerebral hemorrhage evaluating only males, the impact on  
242 microglia transcriptome was also small, affecting only 10% of the evaluated genes [32]. In  
243 addition, in a study evaluating transcriptional changes of resident microglia during aging [33],  
244 there were also important differences between female and male mice; and, the magnitude of  
245 the transcriptional changes occurring during aging was about the same as we see in the dietary  
246 intervention. Thus, it seems that in different brain regions and under distinct interventions, the  
247 magnitude of resident microglia transcriptional changes is quite small; however, the number of  
248 studies evaluating this question is not expressive; thus, further studies are needed to provide a

249 definitive view regarding the actual magnitude of plasticity of resident microglia. Despite the  
250 small number of transcripts undergoing changes in our model, the greatest impact occurred in  
251 the expression of genes related to IL-17 signaling, lipid metabolism, TLR signaling, TNF  
252 signaling, and chemokine signaling, which strongly supports the role of dietary lipids in the  
253 induction of an inflammatory response by the resident microglia, supporting previous studies  
254 in the field [6] [9] [15] [18]. Interestingly, IL17 signaling emerged as a major pathway  
255 modulated by DIO. In a recent study, we have shown that IL17 can act upon POMC neurons  
256 promoting a reduction in calorie intake [34]. The current finding of a transcriptional modulation  
257 of IL17-related genes in resident microglia opens a new perspective in the understanding of  
258 how inflammatory signals modulate the function of the hypothalamus in obesity, which should  
259 be explored in the future.

260 Next, we confronted the transcriptomes of resident and recruited microglia, and in this case,  
261 there were huge differences, reaching over 7,000 transcripts. Per se, this finding reveals a  
262 striking difference between resident and recruited microglia in the hypothalamus of mice fed  
263 an HFD. Nevertheless, despite this is new information regarding the hypothalamus, similar  
264 findings were reported in other brain regions submitted to distinct interventions, such as in an  
265 experimental model of glioma [35], in flavivirus infection [36], and in COVID-19 [37]. The  
266 evaluation of the main pathways differently expressed in the two cell subsets revealed major  
267 differences in lipids, toll-like receptor signaling, tumor necrosis factor signaling, chemokines,  
268 neurotrophins signaling, reactive oxygen species, thermogenesis, and pathways related to  
269 neurodegeneration. The impact of the consumption of an HFD on the regulation of lipid-  
270 related pathways, toll-like receptor, and tumor necrosis factor signaling has been widely  
271 explored in several previous studies, and interventions in these systems are known to mitigate  
272 the harmful effects of the diet [6] [9] [15] [18]. However, little has been done about the  
273 characterization of the mechanisms of chemotaxis that drive the recruitment of bone marrow-  
274 derived cells to the hypothalamus. Therefore, we looked with greater detail into the main  
275 chemokines and chemokine receptors differentially expressed in the two subsets of cells. We  
276 elected Cxcr3 because it was highly expressed in Ccr2 cells and presented low expression in  
277 Cx3cr1 cells. CXCR3 is a chemokine receptor that is involved in the recruitment of distinct types  
278 of bone marrow-derived monocytic cells, such as plasmacytoid monocytes [38], synovial tissue  
279 monocytes [39], and dendritic cells [40]. In the brain, CXCR3-expressing cells have been  
280 implicated in Alzheimer's disease and other age-dependent cognitive dysfunctions [41] [42],  
281 multiple sclerosis [43], epilepsy [44], and stroke [45]. However, no previous study has evaluated  
282 CXCR3 in the hypothalamus in the context of obesity.

283 First, we asked if the known ligands for CXCR3, and Infg, which is induced in response to the  
284 activation of CXCR3, were present in either subset of cells. We found Cxcl11 in neither cell  
285 subset; Cxcl9 was expressed in Cx3cl1 cells, only; Cxcl10 was expressed in both subsets of cells,  
286 with greater expression in Ccr2 cells; and Infg was expressed in Ccr2 cells only. Moreover, there  
287 was a considerable engagement of INF- $\gamma$ -related pathways in Ccr2 cells of both female and  
288 male mice fed an HFD. Thus, we considered CXCR3 as a promising target for intervention.

289 Next, we intervened in one of the ligands for CXCR3, CXCL10. For that, we performed icv  
290 injections of an immunoneutralizing antibody, which resulted in smaller numbers of CCR2 cells  
291 in the hypothalamus. However, the intervention promoted minimal changes in the  
292 hypothalamic expression of transcripts encoding several components of the chemotaxis  
293 machinery. Nevertheless, in females, the inhibition of CXCL10 resulted in increased body mass  
294 gain, reduction of hypothalamic AgRP, trends to reduce hypothalamic Il1b and Il6, and a trend

295 to reduce blood insulin. In males, the phenotype was much milder, leading to minimal changes  
296 in hypothalamic Npy, Il1b, and Il6. Little is known about the involvement of CXCL10 in  
297 hypothalamic physiology and pathology. In a model of caloric restriction, there was an increase  
298 in the hypothalamic expression of Cxcl10 [46], and this was regarded as a component of the  
299 mechanism of neuroprotection induced by caloric restriction. In addition, in a model of  
300 hypothalamic inflammation elicited by exogenous LPS, Cxcl10 emerged as one of the  
301 transcripts undergoing the greatest increase in the hypothalamic paraventricular nucleus [47].

302 As CXCR3 can be engaged by distinct chemokines, we decided to use a broader intervention,  
303 pharmacologically inhibiting CXCR3. AMG487 is a chemical inhibitor of CXCR3 with an IC<sub>50</sub> value  
304 of 8.0 nM [48]. Upon treatment with AMG487, there was a reduction of the migration of Ccr2  
305 cells to the hypothalamus, which was accompanied by minimal changes in the expressions of  
306 chemokines and chemokine receptors. Under inhibition of CXCR3, both female and male mice  
307 presented increased body mass gain, which was accompanied by increased blood leptin,  
308 increased fasting glucose, increased hypothalamic Npy, and a reduction in markers of  
309 hypothalamic inflammation. There were no changes in caloric intake, however, there were  
310 reductions in energy expenditure during some periods during the 24 hours of recording.

311 These findings reveal that at least one subset of recruited microglia, have a protective rather  
312 than a harmful role in DIO-associated hypothalamic inflammation. This is a completely new  
313 concept in the field because all previous studies evaluating hypothalamic microglia in DIO  
314 reported that, once active in response to dietary fats, either resident or recruited microglia  
315 exerted inflammatory actions that impacted negatively energy balance and glucose tolerance  
316 [11] [12] [13] [15]. This concept has been recently explored in depth in a study that used  
317 elegant models to either activate or inactivate microglia [14] and the results confirm that,  
318 whenever manipulating microglia using approaches that are not specific for a given subset of  
319 cells, the net result is worsening of the metabolic phenotype when microglia is activated and  
320 improvement of the metabolic phenotype when microglia is inactivated. Thus, we believe that  
321 the subset of recruited microglia herein identified plays a regulatory role in hypothalamic  
322 inflammation.

323 In conclusion, this study elucidated the transcriptional landscapes of resident and recruited  
324 hypothalamic microglia in DIO. In resident microglia, the consumption of an HFD resulted in  
325 small changes in transcript expression, whereas the confrontation of the transcriptional  
326 landscapes of resident versus recruited microglia revealed broad differences that encompass  
327 lipids, toll-like receptor signaling, tumor necrosis factor signaling, chemokines, neurotrophins  
328 signaling, reactive oxygen species, thermogenesis, and pathways related to neurodegeneration.  
329 In addition, the study revealed a considerable sexual dimorphism in the transcriptional  
330 landscape of both resident and recruited microglia. The study also identified a subset of  
331 recruited microglia, expressing the chemokine receptor Cxcr3 that has a protective role against  
332 the harmful metabolic effects of the HFD; thus, providing a new concept in DIO-associated  
333 hypothalamic inflammation.

334

## 335 **Materials and methods**

336 *Animal care and diets.* All animal care and experimental procedures were conducted in  
337 accordance with the guidelines of the Brazilian College for Animal Experimentation and  
338 approved by the Institutional Animal Care and Use Committee (CEUA 5497-1/2020 and 6210-



339 1/2023). Heterozygous CX3CR1<sup>GFP/+</sup>CCR2<sup>RFP/+</sup> mice were generated by mating CX3CR1<sup>GFP</sup>  
340 homozygous mice (JAX#005582) with CCR2<sup>RFP</sup> homozygous mice (JAX#017586). Genotypes of  
341 these mice were identified by polymerase chain reaction (PCR). Mice were fed on a standard  
342 chow diet (Nuvilab; 3.76 kcal/g; 12.6% energy from protein, 77.7% energy from carbohydrate,  
343 and 9.58% energy from fat) or high-fat diet (HFD) (5.28 kcal/g; 12.88% energy from protein,  
344 27.1% energy from carbohydrate, and 60% energy from fat) according to the experimental  
345 protocols. Food and water were available ad libitum throughout the experimental periods,  
346 except for the protocols that required fasting. The room temperature was controlled (22-24 °C),  
347 and a light-dark cycle was maintained on a 12-hour on-off cycle.

348 *Flow cytometry.* For the separation of CX3CR1<sup>GFP+</sup> and CCR2<sup>RFP+</sup> cells from the white adipose  
349 tissue of CX3CR1<sup>GFP/+</sup>CCR2<sup>RFP/+</sup> mice we collected the retroperitoneal fat depot of one animal  
350 fed on a HFD for 4 weeks. It was minced and digested with type VIII collagenase (0.5 mg/mL,  
351 Sigma-Aldrich) in PBS for 20 min at 37°C with shaking. After digestion, the suspension was  
352 filtered using a 100 µm cell filter. For isolation of the same cells from the hypothalamus,  
353 samples of five CX3CR1<sup>GFP/+</sup>CCR2<sup>RFP/+</sup> mice fed on an HFD for 4 weeks were pooled together and  
354 gently pressed through a cell strainer (100 µm). The cell solution was subjected to a Percoll  
355 gradient (70/40%) for monocyte purification. Samples were acquired on a BDFacs Symphony  
356 instrument (BD Biosciences, USA) and then analyzed using FlowJo software.

357 *Cell sorting.* For cell sorting of CX3CR1<sup>GFP+</sup> and CCR2<sup>RFP+</sup> cells from the hypothalamus, we  
358 employed CX3CR1<sup>GFP</sup> mice fed on chow diet and CX3CR1<sup>GFP/+</sup>CCR2<sup>RFP/+</sup> mice fed on HFD for 4  
359 weeks. Harvested hypothalami of 20-30 male or 20-30 female mice were pooled together for  
360 each sample and gently pressed through a cell strainer (100 µm). The cell solution was  
361 subjected to a Percoll gradient (70/40%) for monocyte purification. The sorting was conducted  
362 on a BDFacs Melody instrument (BD Biosciences, USA).

363 *RNA-sequencing (RNA-Seq) and analysis.* Cell-sorted CX3CR1<sup>GFP+</sup> and CCR2<sup>RFP+</sup> cell samples  
364 from the hypothalamus were lysed for RNA extraction using the RNAqueous Micro kit  
365 (Invitrogen). RNA integrity was analyzed on a Bioanalyzer RNA Pico 6000 chip at the Core  
366 Facility for Scientific Research – University of São Paulo (CEFAP-USP). Low input RNA-Seq library  
367 preparation (Takara SMART-Seq v4) and sequencing by Illumina NovaSeq S2 PE150 Sequencing  
368 Lane (40M read pairs/sample avg) were performed by Maryland Genomics (Institute for  
369 Genome Sciences - IGS, University of Maryland School of Medicine – Baltimore, USA). Illumina  
370 sequencing adapters and low-quality reads were removed with Trimmomatic. Trimmed reads  
371 were aligned to the mouse reference genome (GRCm39) by STAR. Aligned reads were mapped  
372 to features using HTSeq, and differential expression analyses were performed using the DESeq2  
373 package. Genes having less than 3 CPM were excluded prior to statistical analysis, and  
374 differentially expressed genes (DEGs) were selected using as cutoffs the adjusted p-value <  
375 0.05. Heatmaps were performed using Pheatmap and a list of DEGs was passed to EnrichR and  
376 cluster Profiler for enrichment analyses.

377 *CXCL10 immunoneutralization.* For central neutralization of CXCL10, 8-wk CCR2<sup>RFP</sup> male and  
378 female mice underwent a stereotaxic surgery for ICV injections of anti-CXCL10 Monoclonal  
379 Antibody (2 µl, Cat# MA5-23774, Thermo Fischer). The control groups were ICV injected with  
380 Mouse IgG2a Isotype Control (2 µl, Cat#02-6200, Thermo Fischer). Two distinct ICV injections  
381 were performed on Day 0 and Day 14, respectively, of the experimental protocol. For that, mice  
382 were anesthetized with ketamine (100 mg/kg) and xylazine (10 mg/kg) and submitted to  
383 stereotaxic surgery (Ultra Precise–model 963, Kopf). ICV coordinates were [antero-  
384 posterior/lateral/depth to bregma]: -0.46/-1.0/-2.3 mm. Immediately after the first surgery, at

385 Day 0, mice began to be fed on HFD for 4 weeks. From Day 0 to Day 28 food intake and body  
386 weight were evaluated weekly.

387 *CXCR3 antagonism.* For systemic blockage of CXCR3, 8-wk CCR2<sup>RFP</sup> male and female mice  
388 underwent a treatment with AMG487 (Tocris Bioscience, Bristol, UK), an active and selective  
389 CXC chemokine receptor 3 (CXCR3) antagonist. The in vivo formulation of AMG487 was  
390 prepared in 20% hydroxypropyl- $\beta$ -cyclodextrin (Sigma, St. Louis, MO). A 50% hydroxypropyl- $\beta$ -  
391 cyclodextrin (Sigma, St. Louis, MO) solution was prepared and AMG487 was added to this  
392 solution, it was incubated in a sonicating water bath for 2 hours with occasional vortexing.  
393 Next, distilled water was added to give the appropriate final concentration of AMG487 in 20%  
394 of hydroxypropyl- $\beta$ -cyclodextrin. This solution at 20% served as the vehicle. Mice were treated  
395 with AMG487 or vehicle (VEH group) intraperitoneally at 5 mg/kg every 48h throughout four  
396 weeks. During this period, mice were fed on HFD, and food intake and body weight were  
397 evaluated weekly.

398 *Glucose tolerance test.* On the 24th day of CXCR3 blockage and CXCL10 neutralization  
399 experimental protocols, mice were fasted for 6 hours, and blood glucose was measured via tail  
400 bleed at baseline and 15, 30, 60, 90, and 120 min after an intraperitoneal injection of glucose  
401 (2.0 g/kg).

402 *Indirect calorimetry.* The oxygen consumption (VO<sub>2</sub>), carbon dioxide production (VCO<sub>2</sub>), energy  
403 expenditure, and respiratory quotient (RQ) were measured using an indirect open-circuit  
404 calorimeter (Oxylet M3 system; PanLab/Harvard Apparatus, MA, USA). Mice were allowed to  
405 adapt for 12 hours before data were recorded for 24 hours (light and dark cycles).

406 *Immunofluorescence.* On the day 28th of CXCR3 blockage and CXCL10 neutralization  
407 experimental protocols, male and female mice were perfused with 0,9% saline followed by 4%  
408 formaldehyde by cardiac canulation. Brains were extracted and incubated in 4% formaldehyde  
409 overnight at 4 °C for extended fixation. The brains were then incubated in 30% sucrose at 4 °C  
410 for 48h. A series of 20  $\mu$ m-thick frozen sections (4 series equally) were prepared using a  
411 cryostat and stored in an anti-freezing solution. For the free-floating immunostaining, slices  
412 were washed with 0.1 M phosphate-buffered saline (PBS) (3 times, 5 min each) and blocked  
413 with 0.2% Triton X-100 and 5% donkey serum in 0.1 M PBS for 2 h at room temperature. Slices  
414 were incubated overnight at 4 °C with Anti-Cxcr3 (1:200, Cat# NB100-56404, Novus Biologicals)  
415 or Anti-Sialoadhesin/CD169 (1:200, ab18619, Abcam) in a blocking solution. After washing with  
416 0.1 M phosphate-buffered saline (PBS) (3 times, 5 min each), sections were incubated with  
417 fluorophore-labeled secondary antibody (donkey anti-rabbit Alexa Fluor 405, 1:500, Cat#  
418 A48258, Invitrogen or goat anti-mouse Alexa Fluor 405, 1:500, Cat# A31553, Invitrogen) in a  
419 blocking solution for 2 h at room temperature. After washing again with 0.1 M phosphate-  
420 buffered saline (PBS) (3 times, 5 min each), brain slices were mounted onto slides with ProLong  
421 Diamond antifade mountant (Cat# P36930, Thermo Fischer). Sections were visualized with a  
422 Zeiss LSM780, confocal microscope (Carl Zeiss AG, Germany) at the National Institute of  
423 Photonics Applied to Cell Biology (INFABIC) at the University of Campinas.

424 *Quantitative reverse transcription-polymerase chain reaction (qRT-PCR).* Total RNA was  
425 extracted using a TRIzol reagent (Thermo Fisher Scientific) and synthesized cDNA with a High-  
426 Capacity cDNA Reverse Transcription Kit (HighCapacity cDNA Reverse Transcription Kit, Life  
427 Technologies). Real-time PCR reactions were run using the TaqMan system (Applied  
428 Biosystems). Primers used were Cxcr3 (Mm99999054\_s1); Cxcl9 (Mm00434946\_m1), Cxcl10  
429 (Mm00445235\_m1); Cxcl11 (Mm00444662\_m1); Ccl2 (Mm00441242\_m1); Cxcr4

430 (Mm01996749\_s1); Cxcl12 (Mm00445553\_m1), Cxcr6(Mm02620517\_s1), Cxcl16  
431 (Mm00469712\_m1), Cx3cl1(Mm00436454\_m1), Pomc (Mm00435874\_m1), Agrp  
432 (Mm00475829\_g1); Npy (Mm00445771\_m1); Cartpt (Mm04210469\_m1), Pmch  
433 (Mm01242886\_g1), Tnfa (Mm00443258\_m1), Il1b (Mm00434228\_m1), Il6  
434 (Mm00446190\_m1), Nlrp3 (Mm00840904\_m1), Tlr4 (Mm00445273\_m1), Infg  
435 (Mm01168134\_m1). GAPDH (Mm9999915\_g1) was employed as a reference gene. Gene  
436 expression was obtained using the QuantStudio 6 (Thermo Fischer Scientific).

437 *Hormonal and biochemical determinations.* Serum insulin and leptin were measured by an  
438 enzyme-linked immunosorbent assay (ELISA) kit (#EZRMI-13K and #EZML-82K; Millipore).  
439 Serum triglyceride levels and total cholesterol were measured using a commercial colorimetric  
440 assay kit (LaborLab®, Guarulhos - SP, Brazil) following the manufacturer's instructions.

441 *Statistical analysis.* Data are presented as means ± standard error of the mean (SEM). The  
442 statistical analyses were carried out using a non-parametric Mann-Whitney test or two-way  
443 analysis of variance (ANOVA) when appropriate. Post hoc comparisons were performed using  
444 Sidak's test. Statistical significances were analyzed using Prism 8.0 software (GraphPad  
445 Software, La Jolla, CA). A p-value ≤0.05 was considered statistically significant.

446

447

448 *Declaration of Interests/Relevant conflicts of interests/Financial disclosures.* All authors declare no  
449 competing financial or other interests regarding this study.

450 *Authors' contributions.* NFM, EPA and LAV designed and planned the study; NFM, AMZ, DCS, and JFC  
451 performed most of the experiments; NFM and CFA performed FACS and cytometry analysis; GFL  
452 conducted bioinformatic analysis; NOSC provided animals models; PMMM-V supervised the work of CFA  
453 and provided equipment and methods for FACS and cytometry; NFM, EPA, and LAV discussed the data.  
454 NFM and LAV wrote the manuscript and prepared figures; EPA supervised NFM during her doctorate  
455 program. All authors read and approved the final manuscript.

456 *Funding.* This research was funded by The Sao Paulo Research Foundation (FAPESP): 2013/07607-8;  
457 2017/22511-8; and 2021/00443-6.

458 *Data Availability.* Data will be available upon request to the corresponding author, L.A.V  
459 (lavellos@unicamp.br).

460 *Acknowledgments.* We are grateful to Erika Roman, Joseane Morari, Marcio Cruz, and Gerson Ferraz for  
461 laboratory management.

462

## 463 **References**

- 464 [1] Theilade, S., Christensen, M.B., Vilsbøll, T., Knop, F.K., 2021. An overview of obesity mechanisms in  
465 humans: Endocrine regulation of food intake, eating behaviour and common determinants of body  
466 weight. *Diabetes, Obesity & Metabolism* 23 Suppl 1: 17–35, Doi: 10.1111/dom.14270.
- 467 [2] Cavadas, C., Avelaira, C.A., Souza, G.F.P., Velloso, L.A., 2016. The pathophysiology of defective  
468 proteostasis in the hypothalamus - from obesity to ageing. *Nature Reviews. Endocrinology* 12(12):  
469 723–33, Doi: 10.1038/nrendo.2016.107.
- 470 [3] Sonnefeld, L., Rohmann, N., Geisler, C., Laudes, M., 2023. Is human obesity an inflammatory  
471 disease of the hypothalamus? *European Journal of Endocrinology* 188(3): R37–45, Doi:  
472 10.1093/ejendo/lvad030.

- 473 [4] van de Sande-Lee, S., Melhorn, S.J., Rachid, B., Rodovalho, S., De-Lima-Junior, J.C., Campos, B.M.,  
474 et al., 2020. Radiologic evidence that hypothalamic gliosis is improved after bariatric surgery in  
475 obese women with type 2 diabetes. *International Journal of Obesity* (2005) 44(1): 178–85, Doi:  
476 10.1038/s41366-019-0399-8.
- 477 [5] De Souza, C.T., Araujo, E.P., Bordin, S., Ashimine, R., Zollner, R.L., Boschero, A.C., et al., 2005.  
478 Consumption of a fat-rich diet activates a proinflammatory response and induces insulin resistance  
479 in the hypothalamus. *Endocrinology* 146(10): 4192–9, Doi: 10.1210/en.2004-1520.
- 480 [6] Milanski, M., Degasperi, G., Coope, A., Morari, J., Denis, R., Cintra, D.E., et al., 2009. Saturated fatty  
481 acids produce an inflammatory response predominantly through the activation of TLR4 signaling in  
482 hypothalamus: implications for the pathogenesis of obesity. *The Journal of Neuroscience: The*  
483 *Official Journal of the Society for Neuroscience* 29(2): 359–70, Doi: 10.1523/JNEUROSCI.2760-  
484 08.2009.
- 485 [7] Zhang, X., Zhang, G., Zhang, H., Karin, M., Bai, H., Cai, D., 2008. Hypothalamic IKKbeta/NF-kappaB  
486 and ER stress link overnutrition to energy imbalance and obesity. *Cell* 135(1): 61–73, Doi:  
487 10.1016/j.cell.2008.07.043.
- 488 [8] Milanski, M., Arruda, A.P., Coope, A., Ignacio-Souza, L.M., Nunez, C.E., Roman, E.A., et al., 2012.  
489 Inhibition of hypothalamic inflammation reverses diet-induced insulin resistance in the liver.  
490 *Diabetes* 61(6): 1455–62, Doi: 10.2337/db11-0390.
- 491 [9] Thaler, J.P., Yi, C.-X., Schur, E.A., Guyenet, S.J., Hwang, B.H., Dietrich, M.O., et al., 2012. Obesity is  
492 associated with hypothalamic injury in rodents and humans. *The Journal of Clinical Investigation*  
493 122(1): 153–62, Doi: 10.1172/JCI59660.
- 494 [10] Sewaybricker, L.E., Schur, E.A., Melhorn, S.J., Campos, B.M., Askren, M.K., Nogueira, G.A.S., et al.,  
495 2019. Initial evidence for hypothalamic gliosis in children with obesity by quantitative T2 MRI and  
496 implications for blood oxygen-level dependent response to glucose ingestion. *Pediatric Obesity*  
497 14(2): e12486, Doi: 10.1111/ijpo.12486.
- 498 [11] Tapia-González, S., García-Segura, L.M., Tena-Sempere, M., Frago, L.M., Castellano, J.M., Fuente-  
499 Martín, E., et al., 2011. Activation of microglia in specific hypothalamic nuclei and the cerebellum  
500 of adult rats exposed to neonatal overnutrition. *Journal of Neuroendocrinology* 23(4): 365–70,  
501 Doi: 10.1111/j.1365-2826.2011.02113.x.
- 502 [12] Valdearcos, M., Robblee, M.M., Benjamin, D.I., Nomura, D.K., Xu, A.W., Koliwad, S.K., 2014.  
503 Microglia dictate the impact of saturated fat consumption on hypothalamic inflammation and  
504 neuronal function. *Cell Reports* 9(6): 2124–38, Doi: 10.1016/j.celrep.2014.11.018.
- 505 [13] Fernández-Arjona, M.D.M., León-Rodríguez, A., Grondona, J.M., López-Ávalos, M.D., 2022. Long-  
506 term priming of hypothalamic microglia is associated with energy balance disturbances under diet-  
507 induced obesity. *Glia* 70(9): 1734–61, Doi: 10.1002/glia.24217.
- 508 [14] Valdearcos, M., Douglass, J.D., Robblee, M.M., Dorfman, M.D., Stifler, D.R., Bennett, M.L., et al.,  
509 2017. Microglial Inflammatory Signaling Orchestrates the Hypothalamic Immune Response to  
510 Dietary Excess and Mediates Obesity Susceptibility. *Cell Metabolism* 26(1): 185–197.e3, Doi:  
511 10.1016/j.cmet.2017.05.015.
- 512 [15] Morari, J., Anhe, G.F., Nascimento, L.F., de Moura, R.F., Razolli, D., Solon, C., et al., 2014.  
513 Fractalkine (CX3CL1) is involved in the early activation of hypothalamic inflammation in  
514 experimental obesity. *Diabetes* 63(11): 3770–84, Doi: 10.2337/db13-1495.
- 515 [16] Mendes, N.F., Kim, Y.-B., Velloso, L.A., Araújo, E.P., 2018. Hypothalamic Microglial Activation in  
516 Obesity: A Mini-Review. *Frontiers in Neuroscience* 12: 846, Doi: 10.3389/fnins.2018.00846.
- 517 [17] Mendes, N.F., Velloso, L.A., 2022. Perivascular macrophages in high-fat diet-induced hypothalamic  
518 inflammation. *Journal of Neuroinflammation* 19(1): 136, Doi: 10.1186/s12974-022-02519-6.
- 519 [18] Valdearcos, M., Myers, M.G., Koliwad, S.K., 2019. Hypothalamic microglia as potential regulators of  
520 metabolic physiology. *Nature Metabolism* 1(3): 314–20, Doi: 10.1038/s42255-019-0040-0.
- 521 [19] Ginhoux, F., Greter, M., Leboeuf, M., Nandi, S., See, P., Gokhan, S., et al., 2010. Fate Mapping  
522 Analysis Reveals That Adult Microglia Derive from Primitive Macrophages. *Science* 330(6005):  
523 841–5, Doi: 10.1126/science.1194637.
- 524 [20] Saijo, K., Glass, C.K., 2011. Microglial cell origin and phenotypes in health and disease. *Nature*  
525 *Reviews Immunology* 11(11): 775–87, Doi: 10.1038/nri3086.
- 526 [21] Gao, Y., Ottaway, N., Schriever, S.C., Legutko, B., García-Cáceres, C., de la Fuente, E., et al., 2014.  
527 Hormones and diet, but not body weight, control hypothalamic microglial activity. *Glia* 62(1): 17–  
528 25, Doi: 10.1002/glia.22580.

- 529 [22] Chávez-Galán, L., Olleros, M.L., Vesin, D., Garcia, I., 2015. Much More than M1 and M2  
530 Macrophages, There are also CD169(+) and TCR(+) Macrophages. *Frontiers in Immunology* 6: 263,  
531 Doi: 10.3389/fimmu.2015.00263.
- 532 [23] Cole, K.E., Strick, C.A., Paradis, T.J., Ogborne, K.T., Loetscher, M., Gladue, R.P., et al., 1998.  
533 Interferon-inducible T cell alpha chemoattractant (I-TAC): a novel non-ELR CXC chemokine with  
534 potent activity on activated T cells through selective high affinity binding to CXCR3. *The Journal of*  
535 *Experimental Medicine* 187(12): 2009–21, Doi: 10.1084/jem.187.12.2009.
- 536 [24] Walser, T.C., Rifat, S., Ma, X., Kundu, N., Ward, C., Goloubeva, O., et al., 2006. Antagonism of CXCR3  
537 inhibits lung metastasis in a murine model of metastatic breast cancer. *Cancer Research* 66(15):  
538 7701–7, Doi: 10.1158/0008-5472.CAN-06-0709.
- 539 [25] Greter, M., Lelios, I., Croxford, A.L., 2015. Microglia Versus Myeloid Cell Nomenclature during Brain  
540 Inflammation. *Frontiers in Immunology* 6, Doi: 10.3389/fimmu.2015.00249.
- 541 [26] Yona, S., Kim, K.-W., Wolf, Y., Mildner, A., Varol, D., Breker, M., et al., 2013. Fate Mapping Reveals  
542 Origins and Dynamics of Monocytes and Tissue Macrophages under Homeostasis. *Immunity* 38(1):  
543 79–91, Doi: 10.1016/j.immuni.2012.12.001.
- 544 [27] Goldmann, T., Wieghofer, P., Müller, P.F., Wolf, Y., Varol, D., Yona, S., et al., 2013. A new type of  
545 microglia gene targeting shows TAK1 to be pivotal in CNS autoimmune inflammation. *Nature*  
546 *Neuroscience* 16(11): 1618–26, Doi: 10.1038/nn.3531.
- 547 [28] Mildner, A., Schmidt, H., Nitsche, M., Merkler, D., Hanisch, U.-K., Mack, M., et al., 2007. Microglia  
548 in the adult brain arise from Ly-6ChiCCR2+ monocytes only under defined host conditions. *Nature*  
549 *Neuroscience* 10(12): 1544–53, Doi: 10.1038/nn2015.
- 550 [29] Young, A.M.H., Kumasaka, N., Calvert, F., Hammond, T.R., Knights, A., Panousis, N., et al., 2021. A  
551 map of transcriptional heterogeneity and regulatory variation in human microglia. *Nature Genetics*  
552 53(6): 861–8, Doi: 10.1038/s41588-021-00875-2.
- 553 [30] Campbell, J.N., Macosko, E.Z., Fenselau, H., Pers, T.H., Lyubetskaya, A., Tenen, D., et al., 2017. A  
554 molecular census of arcuate hypothalamus and median eminence cell types. *Nature Neuroscience*  
555 20(3): 484–96, Doi: 10.1038/nn.4495.
- 556 [31] Rivera-Escalera, F., Pinney, J.J., Owlett, L., Ahmed, H., Thakar, J., Olschowka, J.A., et al., 2019. IL-1 $\beta$ -  
557 driven amyloid plaque clearance is associated with an expansion of transcriptionally  
558 reprogrammed microglia. *Journal of Neuroinflammation* 16(1): 261, Doi: 10.1186/s12974-019-  
559 1645-7.
- 560 [32] Taylor, R.A., Chang, C.-F., Goods, B.A., Hammond, M.D., Mac Grory, B., Ai, Y., et al., 2017. TGF- $\beta$ 1  
561 modulates microglial phenotype and promotes recovery after intracerebral hemorrhage. *The*  
562 *Journal of Clinical Investigation* 127(1): 280–92, Doi: 10.1172/JCI88647.
- 563 [33] Li, X., Li, Y., Jin, Y., Zhang, Y., Wu, J., Xu, Z., et al., 2023. Transcriptional and epigenetic decoding of  
564 the microglial aging process. *Nature Aging*, Doi: 10.1038/s43587-023-00479-x.
- 565 [34] Nogueira, G., Solon, C., Carraro, R.S., Engel, D.F., Ramalho, A.F., Sidarta-Oliveira, D., et al., 2020.  
566 Interleukin-17 acts in the hypothalamus reducing food intake. *Brain, Behavior, and Immunity* 87:  
567 272–85, Doi: 10.1016/j.bbi.2019.12.012.
- 568 [35] Ochocka, N., Segit, P., Walentynowicz, K.A., Wojnicki, K., Cyranowski, S., Swatler, J., et al., 2021.  
569 Single-cell RNA sequencing reveals functional heterogeneity of glioma-associated brain  
570 macrophages. *Nature Communications* 12(1): 1151, Doi: 10.1038/s41467-021-21407-w.
- 571 [36] Spiteri, A.G., Wishart, C.L., Ni, D., Viengkhou, B., Macia, L., Hofer, M.J., et al., 2023. Temporal  
572 tracking of microglial and monocyte single-cell transcriptomics in lethal flavivirus infection. *Acta*  
573 *Neuropathologica Communications* 11(1): 60, Doi: 10.1186/s40478-023-01547-4.
- 574 [37] Schwabenland, M., Salié, H., Tanevski, J., Killmer, S., Lago, M.S., Schlaak, A.E., et al., 2021. Deep  
575 spatial profiling of human COVID-19 brains reveals neuroinflammation with distinct  
576 microanatomical microglia-T-cell interactions. *Immunity* 54(7): 1594-1610.e11, Doi:  
577 10.1016/j.immuni.2021.06.002.
- 578 [38] Cella, M., Jarrossay, D., Facchetti, F., Alebardi, O., Nakajima, H., Lanzavecchia, A., et al., 1999.  
579 Plasmacytoid monocytes migrate to inflamed lymph nodes and produce large amounts of type I  
580 interferon. *Nature Medicine* 5(8): 919–23, Doi: 10.1038/11360.
- 581 [39] Katschke, K.J., Rottman, J.B., Ruth, J.H., Qin, S., Wu, L., LaRosa, G., et al., 2001. Differential  
582 expression of chemokine receptors on peripheral blood, synovial fluid, and synovial tissue  
583 monocytes/macrophages in rheumatoid arthritis. *Arthritis and Rheumatism* 44(5): 1022–32, Doi:  
584 10.1002/1529-0131(200105)44:5<1022::AID-ANR181>3.0.CO;2-N.

- 585 [40] Padovan, E., Spagnoli, G.C., Ferrantini, M., Heberer, M., 2002. IFN-alpha2a induces IP-10/CXCL10  
586 and MIG/CXCL9 production in monocyte-derived dendritic cells and enhances their capacity to  
587 attract and stimulate CD8+ effector T cells. *Journal of Leukocyte Biology* 71(4): 669–76.
- 588 [41] Jorfi, M., Park, J., Hall, C.K., Lin, C.-C.J., Chen, M., von Maydell, D., et al., 2023. Infiltrating CD8+ T  
589 cells exacerbate Alzheimer's disease pathology in a 3D human neuroimmune axis model. *Nature*  
590 *Neuroscience* 26(9): 1489–504, Doi: 10.1038/s41593-023-01415-3.
- 591 [42] Schroer, A.B., Ventura, P.B., Sucharov, J., Misra, R., Chui, M.K.K., Bieri, G., et al., 2023. Platelet  
592 factors attenuate inflammation and rescue cognition in ageing. *Nature* 620(7976): 1071–9, Doi:  
593 10.1038/s41586-023-06436-3.
- 594 [43] Bogers, L., Engelenburg, H.J., Janssen, M., Unger, P.-P.A., Melief, M.-J., Wierenga-Wolf, A.F., et al.,  
595 2023. Selective emergence of antibody-secreting cells in the multiple sclerosis brain. *EBioMedicine*  
596 89: 104465, Doi: 10.1016/j.ebiom.2023.104465.
- 597 [44] Liang, P., Zhang, X., Zhang, Y., Wu, Y., Song, Y., Wang, X., et al., 2023. Neurotoxic A1 astrocytes  
598 promote neuronal ferroptosis via CXCL10/CXCR3 axis in epilepsy. *Free Radical Biology & Medicine*  
599 195: 329–42, Doi: 10.1016/j.freeradbiomed.2023.01.002.
- 600 [45] Cai, W., Shi, L., Zhao, J., Xu, F., Dufort, C., Ye, Q., et al., 2022. Neuroprotection against ischemic  
601 stroke requires a specific class of early responder T cells in mice. *The Journal of Clinical*  
602 *Investigation* 132(15): e157678, Doi: 10.1172/JCI157678.
- 603 [46] Matthews, D., Diskin, M.G., Kenny, D.A., Creevey, C.J., Keogh, K., Waters, S.M., 2017. Effect of short  
604 term diet restriction on gene expression in the bovine hypothalamus using next generation RNA  
605 sequencing technology. *BMC Genomics* 18(1): 857, Doi: 10.1186/s12864-017-4265-6.
- 606 [47] Reyes, T.M., Walker, J.R., DeCino, C., Hogenesch, J.B., Sawchenko, P.E., 2003. Categorically distinct  
607 acute stressors elicit dissimilar transcriptional profiles in the paraventricular nucleus of the  
608 hypothalamus. *The Journal of Neuroscience: The Official Journal of the Society for Neuroscience*  
609 23(13): 5607–16, Doi: 10.1523/JNEUROSCI.23-13-05607.2003.
- 610 [48] Johnson, M., Li, A.-R., Liu, J., Fu, Z., Zhu, L., Miao, S., et al., 2007. Discovery and optimization of a  
611 series of quinazolinone-derived antagonists of CXCR3. *Bioorganic & Medicinal Chemistry Letters*  
612 17(12): 3339–43, Doi: 10.1016/j.bmcl.2007.03.106.
- 613
- 614
- 615
- 616

617 **Table**

618 **Table 1.** Number of DEGs for each comparison

|                                                              |                                                | ↑ Up | ↓ Down |
|--------------------------------------------------------------|------------------------------------------------|------|--------|
| <b>Effect of the diet in brain resident microglia cells</b>  | <b>hfd_cx_f</b>                                |      |        |
|                                                              | Cx3cr1_hfd_female<br>vs.<br>Cx3cr1_chow_female | 25   | 9      |
|                                                              | <b>hfd_cx_m</b>                                |      |        |
|                                                              | Cx3cr1_hfd_male<br>vs.<br>Cx3cr1_chow_male     | 261  | 151    |
| <b>Effect of the sex in brain resident microglia cells</b>   | <b>chow_cx</b>                                 |      |        |
|                                                              | Cx3cr1_chow_male<br>vs.<br>Cx3cr1_chow_female  | 9    | 11     |
|                                                              | <b>hfd_cx</b>                                  |      |        |
|                                                              | Cx3cr1_hfd_male<br>vs.<br>Cx3cr1_hfd_female    | 7    | 5      |
| <b>Brain resident microglia cells vs. infiltrating cells</b> | <b>hfd_cc_f</b>                                |      |        |
|                                                              | Cx3cr1_hfd_female<br>vs.<br>Ccr2_hfd_female    | 4036 | 3569   |
|                                                              | <b>hfd_cc_m</b>                                |      |        |
|                                                              | Cx3cr1_hfd_male<br>vs.<br>Ccr2_hfd_male        | 3838 | 3350   |
| <b>Effect of the sex in infiltrating cells</b>               | <b>hfd_cc</b>                                  |      |        |
|                                                              | Ccr2_hfd_male<br>vs.<br>Ccr2_hfd_female        | 1598 | 1676   |

619

620

621

622

623

624

625

626

627 **Figures**

628

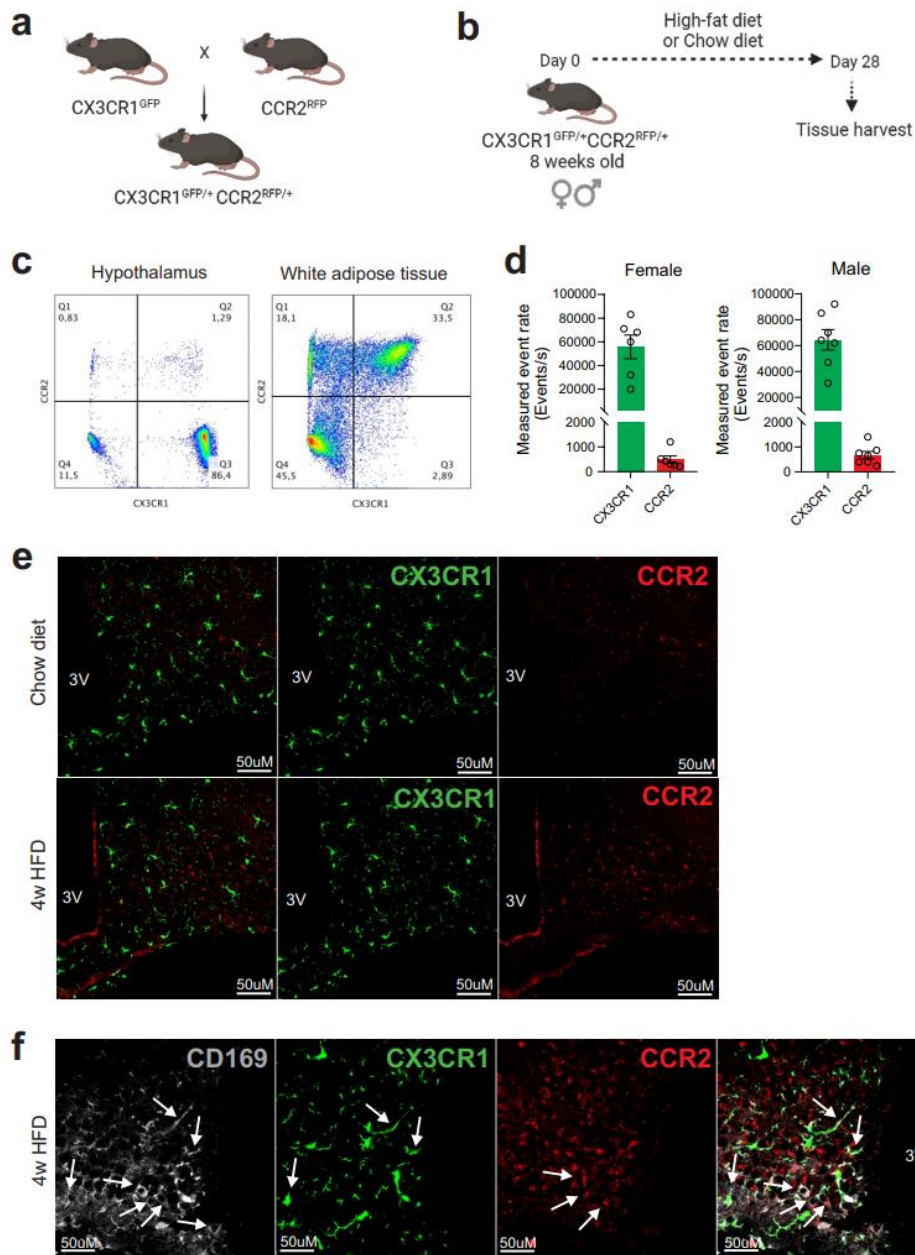

629

630 **Figure 1. CCR2+ cells infiltrate the hypothalamus of mice fed a high-fat diet.** a) CX3CR1<sup>GFP/+</sup>CCR2<sup>RFP/+</sup>  
 631 dual-reporter mutant mice generation. b) Schematic representation of the experimental protocol for  
 632 analysis of HFD-induced CCR2+ peripheral-cell chemotaxis towards the hypothalamus. c) Flow cytometry  
 633 analysis of CX3CR1<sup>GFP/+</sup> and CCR2<sup>RFP/+</sup> cells in the white adipose tissue and in the hypothalamus of HFD-fed  
 634 mice. d) Measured event rate detected by flow cytometer of CX3CR1<sup>GFP/+</sup> and CCR2<sup>RFP/+</sup> cells isolated from  
 635 the hypothalamus of HFD-fed male and female mice. e) Coronal brain sections of mediobasal  
 636 hypothalamus (MBH) from chow- and 4 weeks HFD-fed mice CX3CR1<sup>GFP/+</sup>CCR2<sup>RFP/+</sup>. f) Coronal brain  
 637 sections of MBH from 4 weeks HFD-fed mice CX3CR1<sup>GFP/+</sup>CCR2<sup>RFP/+</sup> immunostained for CD169  
 638 (Sialoadhesin). White arrows indicate overlap between CD169+ cells with CX3CR1+ cells or with CCR2+  
 639 cells. 3V = Third ventricle, Scale Bar = 50 μm.

640



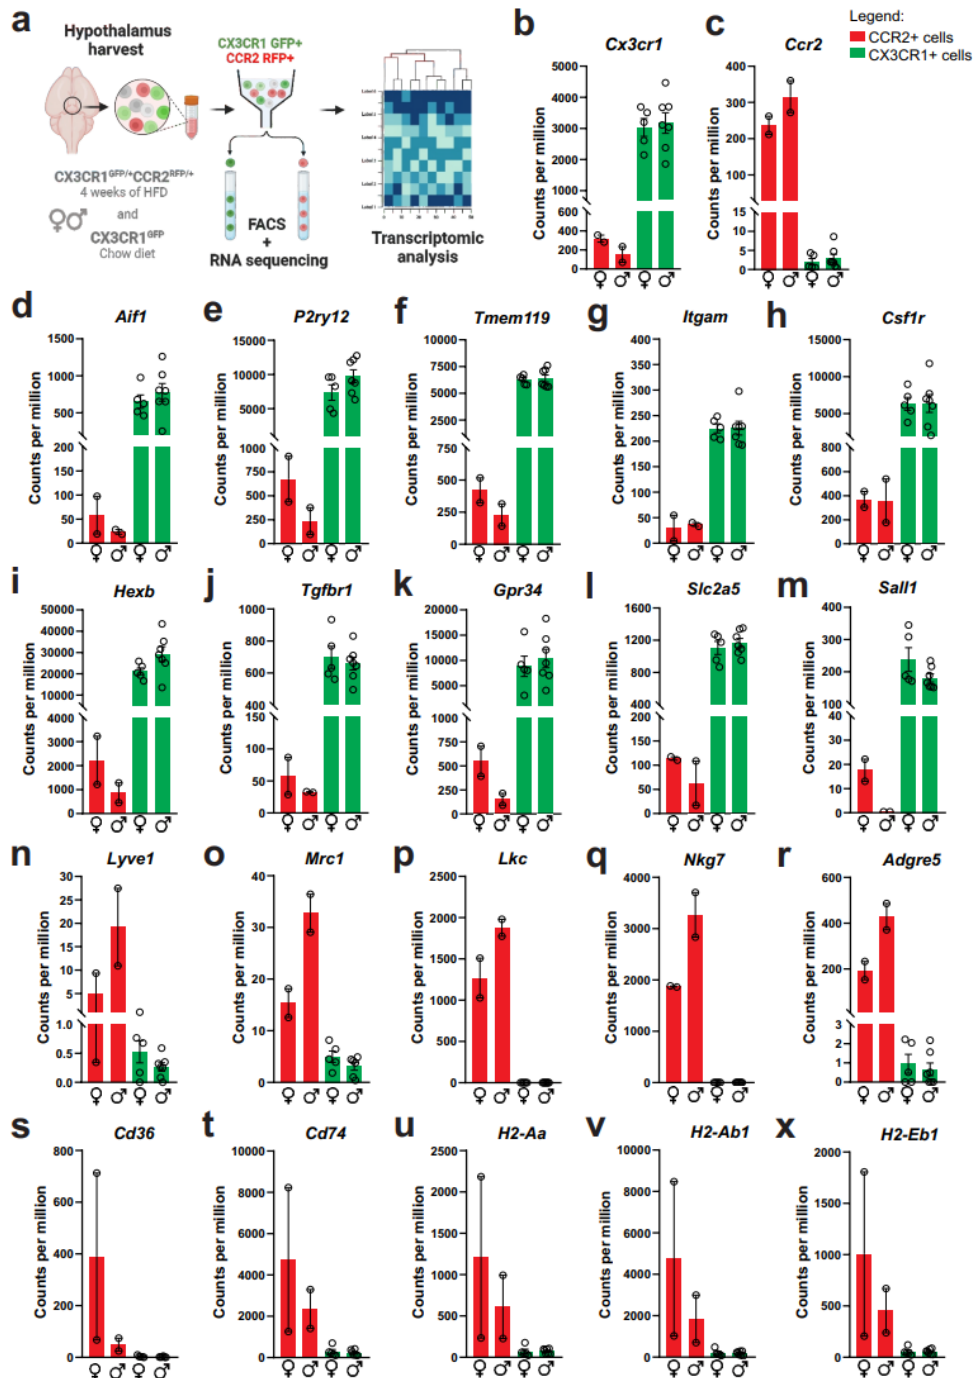

641

642 **Figure 2. CX3CR1+ resident and CCR2+ recruited cells sorted from the hypothalamus of HFD-fed mice**  
 643 **express classical markers of microglia and other immune cells.** a) Schematic representation of the  
 644 experimental protocol for sorting and sequencing CX3CR1+ and CCR2+ cells from the hypothalamus of  
 645 chow- and HFD-fed mice. b) *Cx3cr1* gene expression and c) *Ccr2* gene expression of CX3CR1+ and CCR2+  
 646 cells sorted from the hypothalamus of HFD-fed mice. Analysis of d-m) classical microglial markers and n-  
 647 x) bone marrow-derived immune cell markers in the transcriptome of CX3CR1+ and CCR2+ cells sorted  
 648 from the hypothalamus of HFD-fed mice. To perform RNA-sequencing we have employed a total of 200  
 649 mice of each sex fed on HFD and 100 mice of each sex fed on chow diet. They were divided in 5  
 650 independent experiments. In order to get total RNA amount from CCR2+ cells in the hypothalamus of  
 651 HFD-fed mice that was enough for library construction and RNA-seq, CCR2+ samples were pooled  
 652 together in 3 samples, but only 2 samples could be sequenced due the final RNA integrity and amount.

653

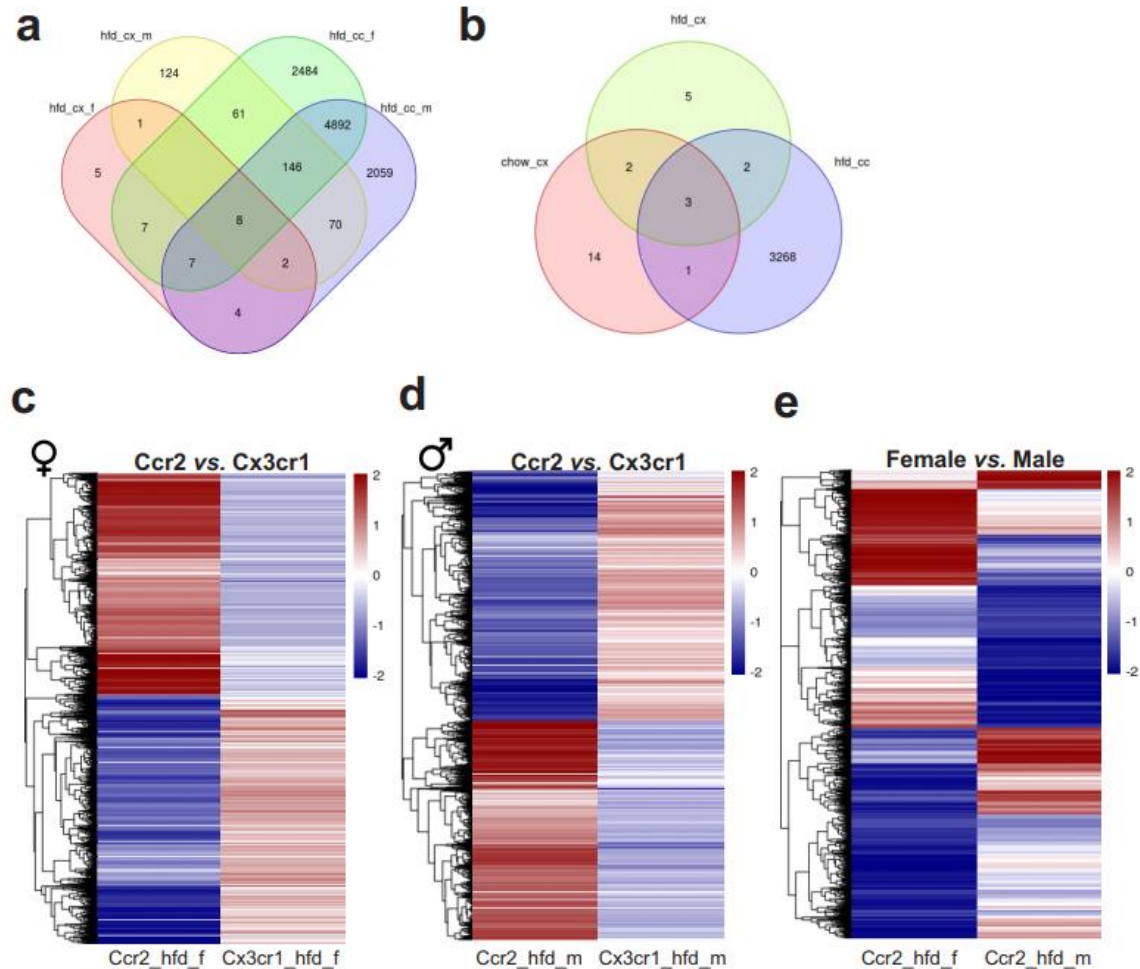

654

655 **Figure 3. Differential gene expression (DGE) analysis of CX3CR1+ resident microglia and CCR2+**  
 656 **infiltrating cells sorted from the hypothalamus of HFD-fed mice show an enormous difference in their**  
 657 **transcriptomic signature.** A-b) Venn diagram showing the number of DGEs for chow and HFD diet  
 658 comparison and sex comparison, respectively. c) Heatmap of up and downregulated DEGs when  
 659 comparing CX3CR1+ resident and CCR2+ infiltrating cells from HFD-fed female mice. d) Heatmap of up  
 660 and downregulated DEGs when comparing CX3CR1+ resident and CCR2+ infiltrating cells from HFD-fed  
 661 male mice. e) Heatmap of up and downregulated DEGs when comparing CCR2+ infiltrating cells from  
 662 HFD-fed male and female mice. hfd\_cx\_f = Cx3cr1\_hfd\_female vs. Cx3cr1\_chow\_female; hfd\_cx\_m =  
 663 Cx3cr1\_hfd\_male vs. Cx3cr1\_chow\_male; chow\_cx = Cx3cr1\_chow\_male vs. Cx3cr1\_chow\_female;  
 664 hfd\_cx = Cx3cr1\_hfd\_male vs. Cx3cr1\_hfd\_female; hfd\_cc\_f = Cx3cr1\_hfd\_female vs. Ccr2\_hfd\_female;  
 665 hfd\_cc\_m = Cx3cr1\_hfd\_male vs. Ccr2\_hfd\_male; hfd\_cc = Ccr2\_hfd\_male vs. Ccr2\_hfd\_female.

666

667

668

669

670

671

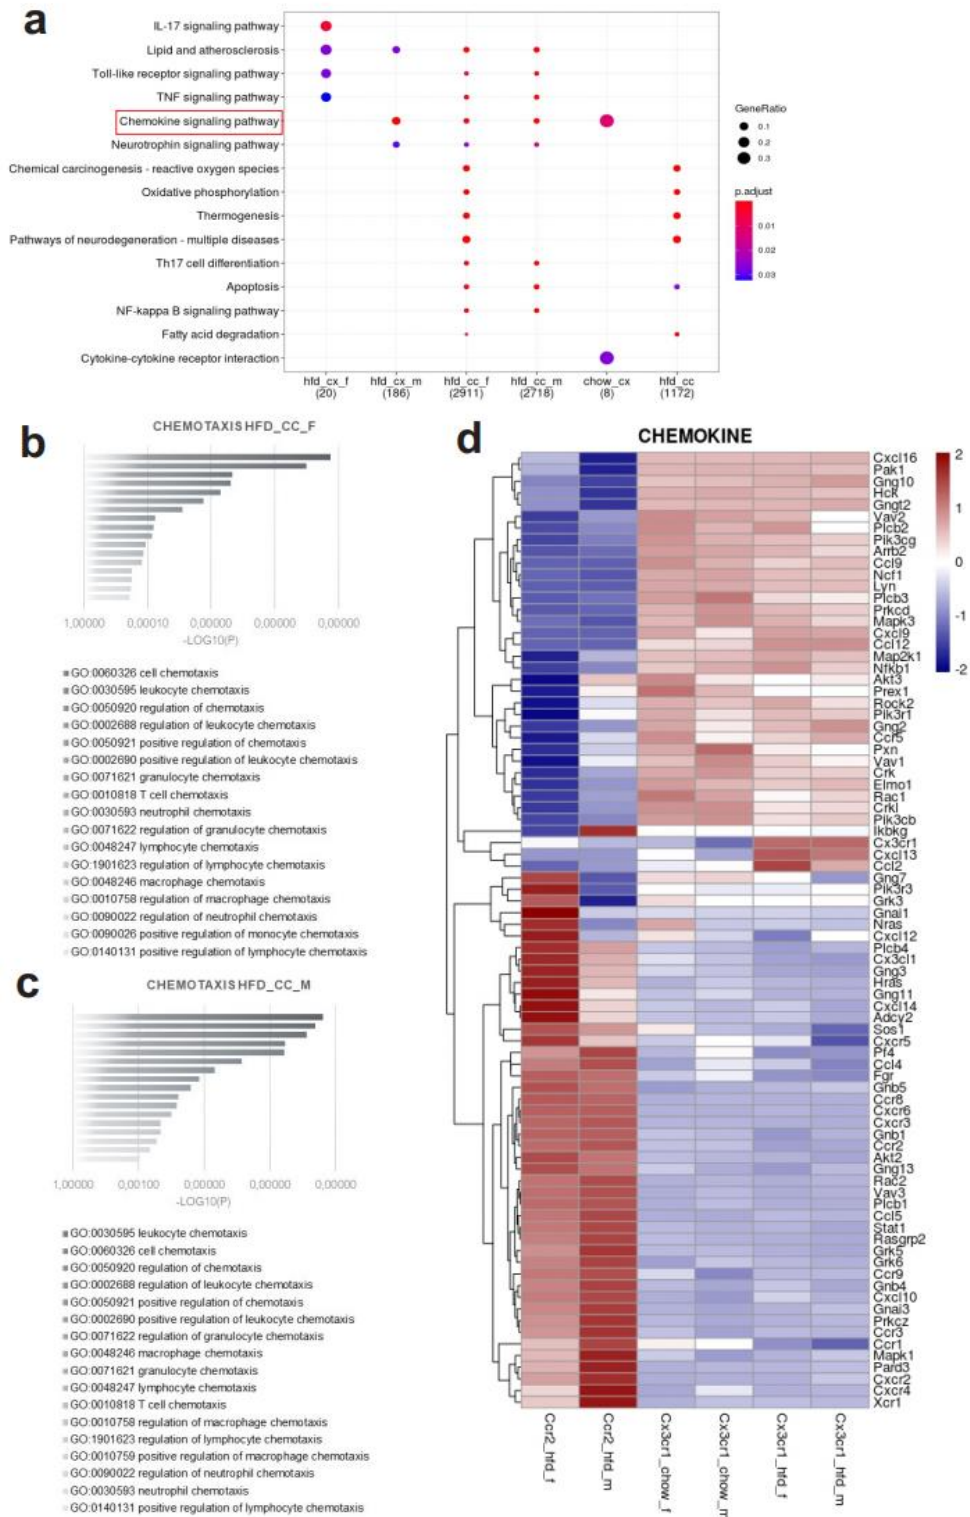

672

673

674 **Figure 4. Various differential gene expression (DGE) found in CCR2+ infiltrating cells from**  
 675 **hypothalamus of HFD-fed mice belongs to chemotaxis pathways.** a) KEGG enrichment analysis shows  
 676 the distribution of DGEs in distinct metabolic pathways. b-c) Ontology analysis for DGEs related to  
 677 chemotaxis from CCR2+ cells sorted from the hypothalamus of HFD-fed female and  
 678 respectively. d) Heatmap of up and downregulated DEGs related to chemotaxis when comparing  
 679 CX3CR1+ resident and CCR2+ infiltrating cells from HFD-fed male and female mice.

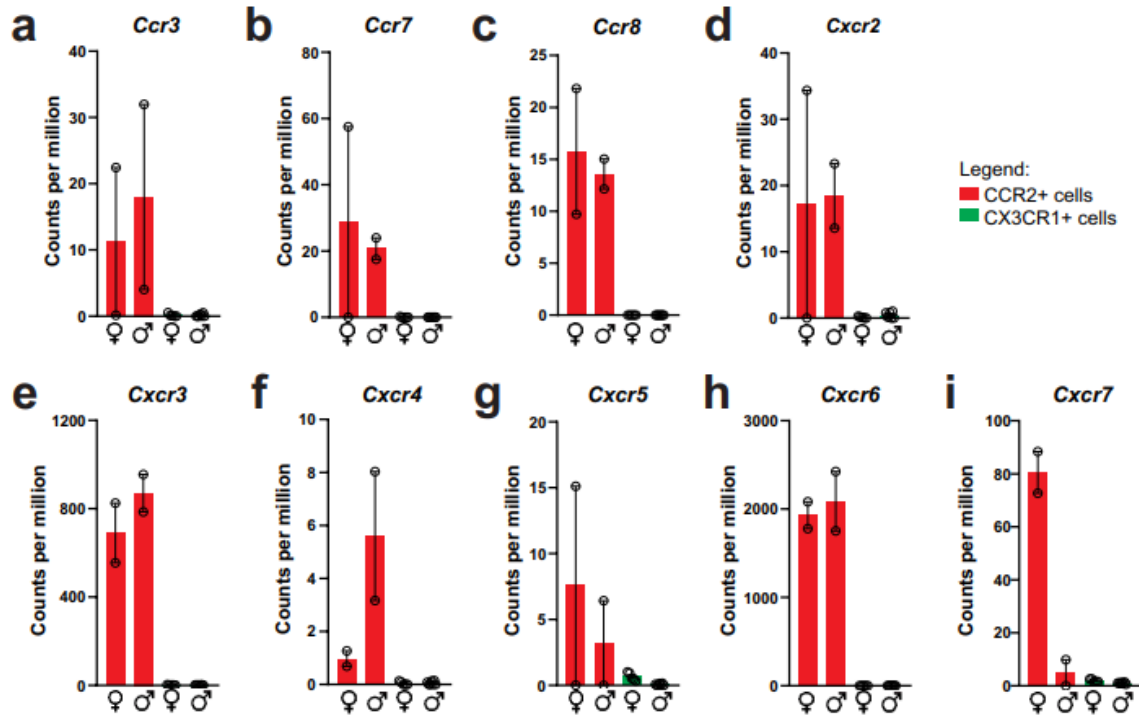

680

681

682 **Figure 5. CCR2+ infiltrating cells from the hypothalamus of HFD-fed mice express a broad of**  
683 **chemokine receptors. a-i) Chemokine receptors gene expression in the transcriptome of CX3CR1+ and**  
684 **CCR2+ cells sorted from the hypothalamus of HFD-fed mice.**

685

686

687

688

689

690

691

692

693

694

695

696

697

698

699

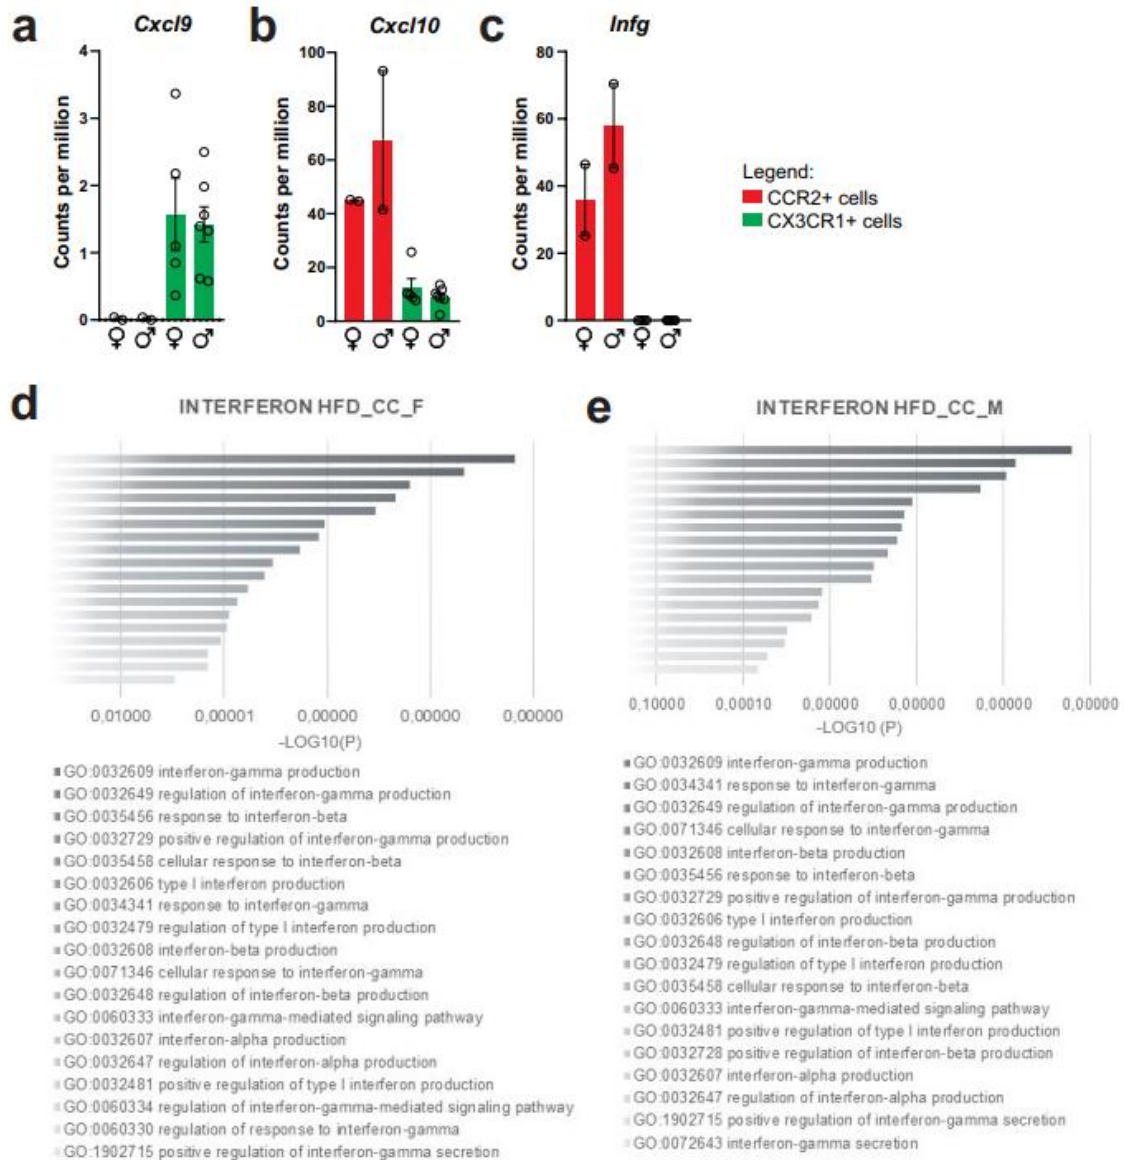

700

701 **Figure 6. CXCL10/interferon  $\gamma$ -induced protein 10 kDa (IP-10) is highly expressed in CCR2+ infiltrating**

702 **cells from the hypothalamus of HFD-fed mice. a-c) Cxcl9, Cxcl10 and Ifng gene expression in the**

703 **transcriptome of CX3CR1+ and CCR2+ cells sorted from the hypothalamus of HFD-fed mice. d-e)**

704 **Ontology analysis for DGEs related to interferon signaling pathways from CCR2+ cells sorted from the**

705 **hypothalamus of HFD-fed female and male mice, respectively.**

706

707

708

709

710

711

712

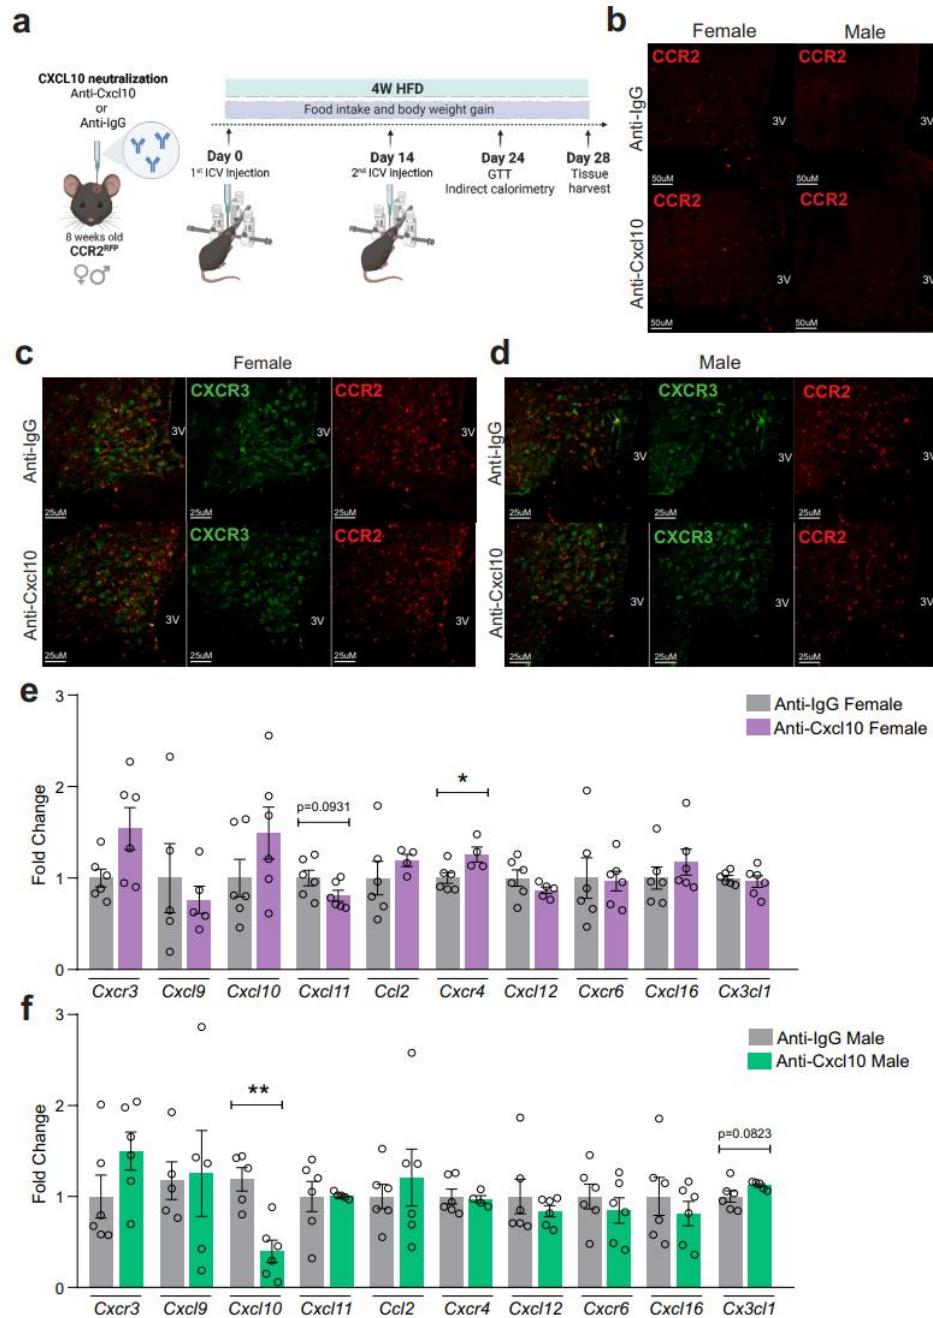

713

714 **Figure 7. CXCL10 neutralization has a mild impact on reducing CCR2+ and CXCR3+ cell chemotaxis**  
 715 **towards the hypothalamus of HFD-fed mice.** a) Schematic representation of the experimental protocol  
 716 for CXCL10 central neutralization. b) Coronal brain sections from 4 weeks HFD-fed CCR2<sup>RFP</sup> mice showing  
 717 the CCR2+ cells distribution in the hypothalamic parenchyma upon CXCL10 central neutralization. 3V =  
 718 Third ventricle, Scale Bars = 50  $\mu$ m. c) Coronal brain sections from 4 weeks HFD-fed female CCR2<sup>RFP</sup> mice  
 719 immunostained for CXCR3 upon CXCL10 central neutralization. d) Coronal brain sections from 4 weeks  
 720 HFD-fed male CCR2<sup>RFP</sup> mice immunostained for CXCR3 upon CXCL10 central neutralization. 3V = Third  
 721 ventricle, Scale Bars = 25  $\mu$ m. e-f) Hypothalamic mRNA levels of several chemokine receptors and  
 722 chemokines in HFD-fed female (light gray and purple bars) and male (light gray and green bars) CCR2<sup>RFP</sup>  
 723 mice upon CXCL10 central neutralization. For qualitative confocal image analysis, we have used 3  
 724 samples per group. For RT-qPCR of hypothalamus we have used 5-6 samples per group. Two-tailed  
 725 Mann-Whitney tests were used for statistical analyses. \* $p<0.05$  and \*\* $p<0.01$  in comparison with  
 726 respective Anti-IgG treated groups.

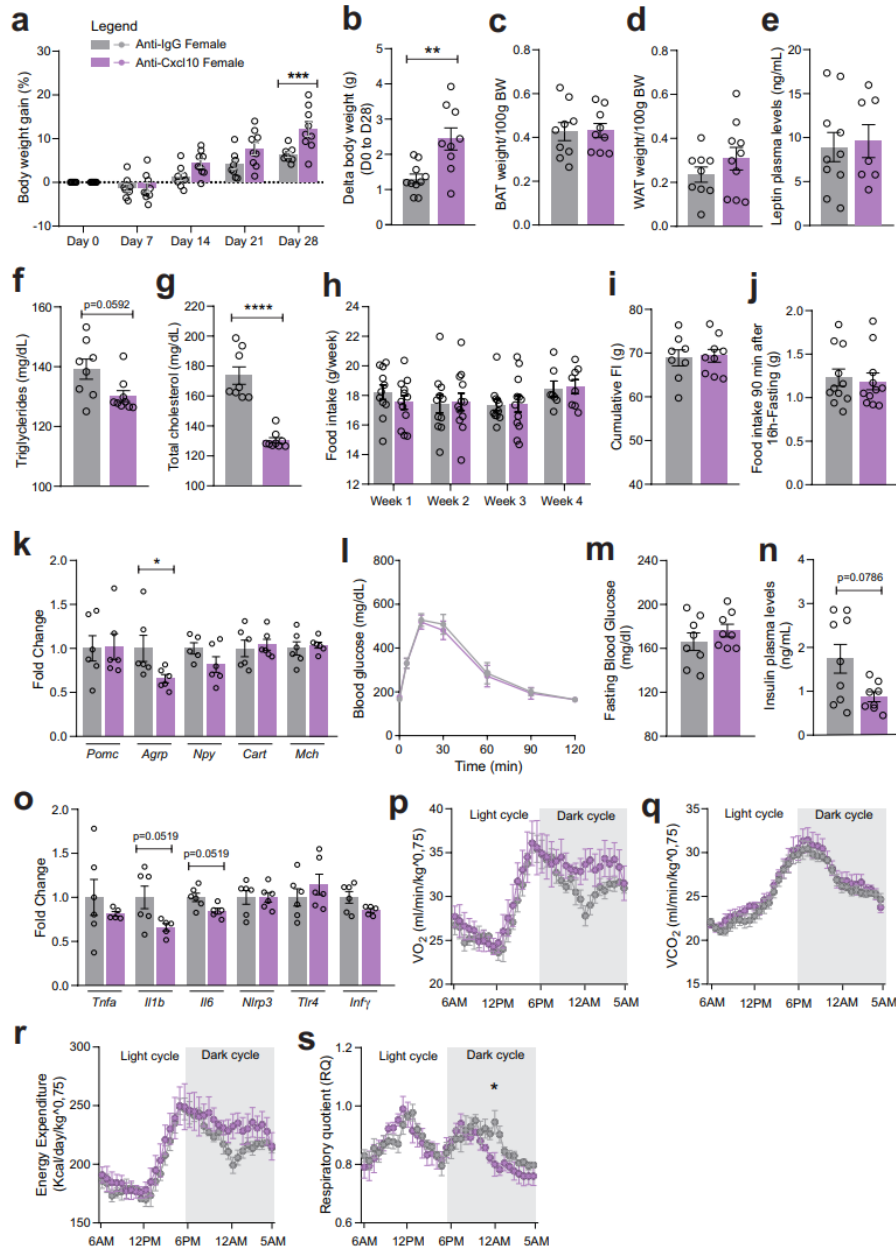

727

728 **Figure 8. CXCL10 central neutralization in HFD-fed female mice.** a) Percentual of body weight gain from  
 729 Day 0 to Day 28 of the experimental protocol. b) Delta body weight during the experimental period. c)  
 730 Brown adipose tissue weight and d) White adipose tissue (retroperitoneal depot) weight at Day 28. e)  
 731 Leptin, f) Triglycerides and g) Total cholesterol plasma levels at Day 28. h) Weekly food intake  
 732 measurement during experimental period. i) Cumulative food intake during the experimental period. j)  
 733 90 min food intake measurement after 16h-fasting. k) Hypothalamic mRNA levels of neuropeptides  
 734 involved in food intake control. l) Intraperitoneal glucose tolerance test at Day 24. m) 6h-fasting blood  
 735 glucose levels. n) Insulin plasma levels at Day 28. o) Hypothalamic mRNA levels of inflammatory genes.  
 736 p) O<sub>2</sub> consumption; q) CO<sub>2</sub> production; r) Energy Expenditure and s) Respiratory Quotient at Day 24. Data  
 737 were expressed as mean ± SEM of 8-10 mice per group (in two independent experiments). To perform  
 738 qRT-PCR we have used 6 mice/group. To perform biochemical analysis in plasma we have used 8-10  
 739 mice/group. To perform ipGTT we have used 4 mice/group. To perform indirect calorimetry, we have  
 740 used 4 mice/group. Two-way ANOVA following by Sidak's post-hoc test and Mann-Whitney test were  
 741 used for statistical analyses. \*p<0.05, \*\*p<0.01, \*\*\*p<0.001, \*\*\*\*p<0.0001 in comparison with IgG  
 742 treated group.

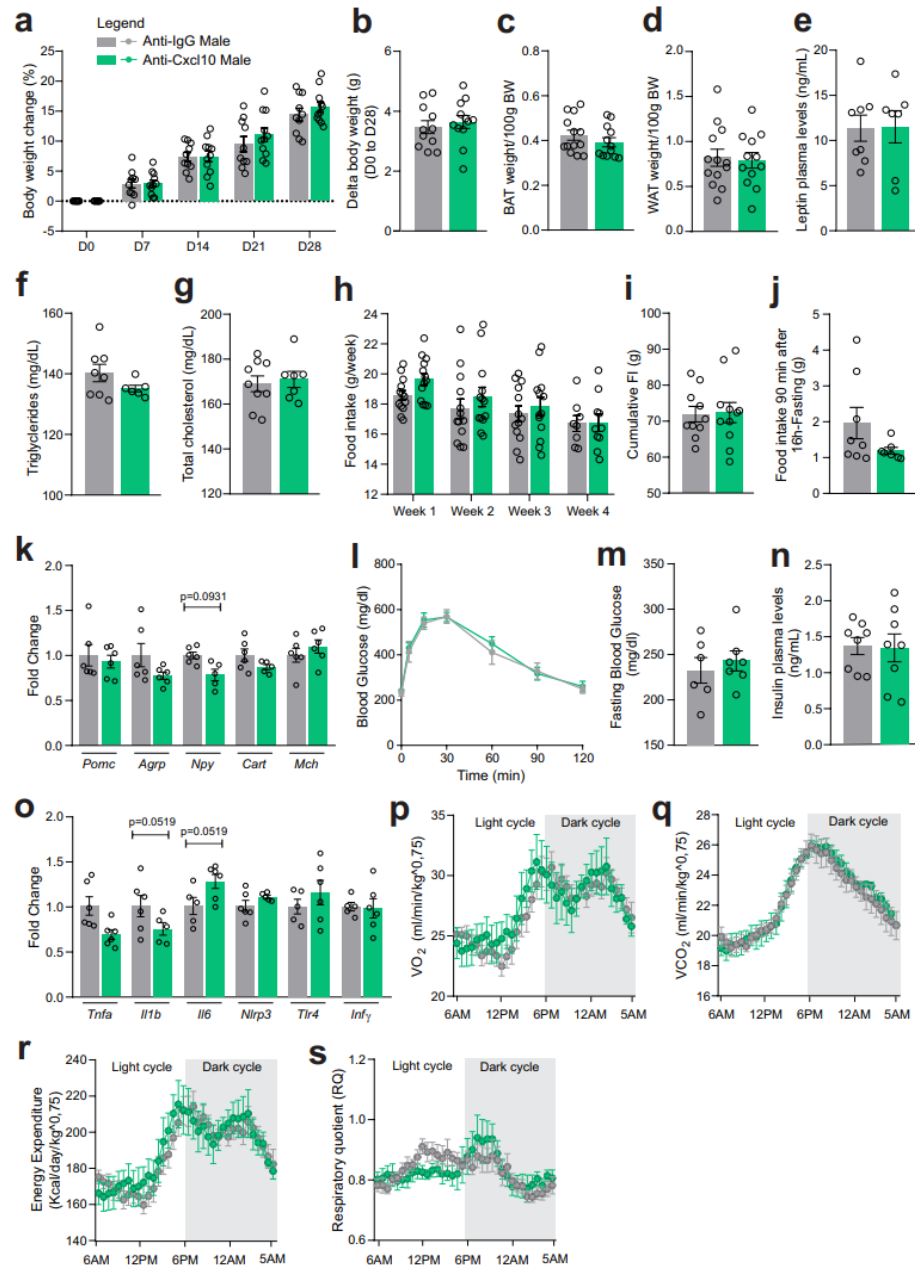

743

744 **Figure 9. CXCL10 central neutralization in HFD-fed male mice.** a) Percentual of body weight gain from  
 745 Day 0 to Day 28 of the experimental protocol. b) Delta body weight during the experimental period. c)  
 746 Brown adipose tissue weight and d) White adipose tissue (retroperitoneal depot) weight at Day 28. e)  
 747 Leptin, f) Triglycerides and g) Total cholesterol plasma levels at Day 28. h) Weekly food intake  
 748 measurement during experimental period. i) Cumulative food intake during the experimental period. j)  
 749 90 min food intake measurement after 16h-fasting. k) Hypothalamic mRNA levels of neuropeptides  
 750 involved in food intake control. l) Intraperitoneal glucose tolerance test at Day 24. m) 6h-fasting blood  
 751 glucose levels. n) Insulin plasma levels at Day 28. o) Hypothalamic mRNA levels of inflammatory genes.  
 752 p)  $O_2$  consumption; q)  $CO_2$  production; r) Energy Expenditure and s) Respiratory Quotient at Day 24. Data  
 753 were expressed as mean  $\pm$  SEM of 8-10 mice per group (in two independent experiments). To perform  
 754 qRT-PCR we have used 6 mice/group. To perform biochemical analysis in plasma we have used 8-10  
 755 mice/group. To perform ipGTT we have used 4 mice/group. To perform indirect calorimetry, we have  
 756 used 4 mice/group. Two-way ANOVA following by Sidak's post-hoc test and Mann-Whitney test were  
 757 used for statistical analyses. \*p<0.05, \*\*p<0.01, \*\*\*p<0.001, \*\*\*\*p<0.0001 in comparison with IgG  
 758 treated group.



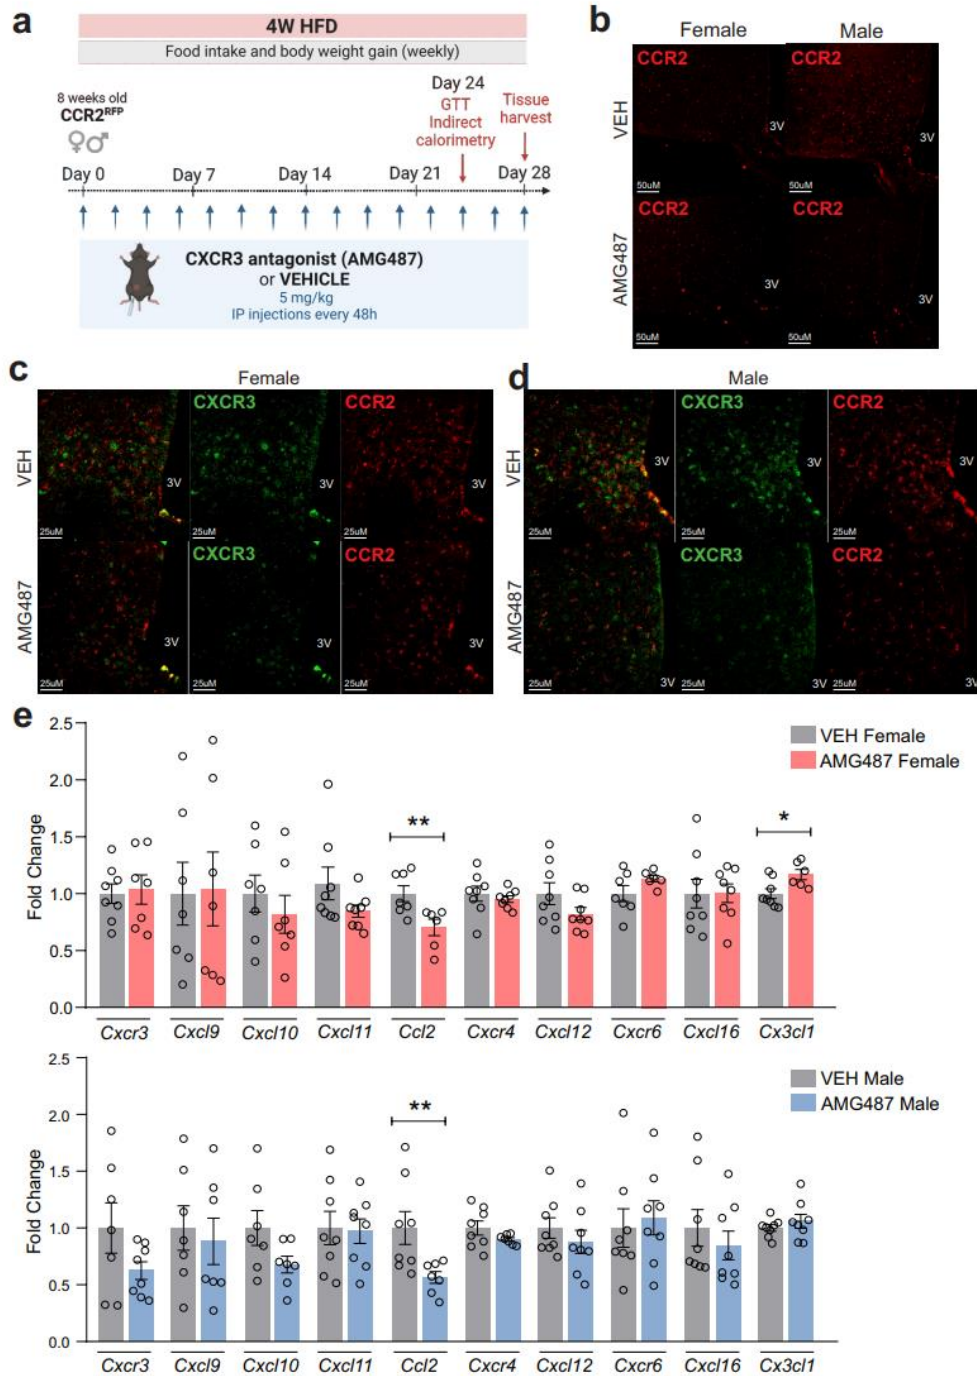

759

760 **Figure 10. AMG487 treatment attenuates CCR2+ and CXCR3+ cell chemotaxis towards the**  
 761 **hypothalamus of HFD-fed mice.** a) Schematic representation of the experimental protocol for CXCR3  
 762 systemic blockage. b) Coronal brain sections from 4 weeks HFD-fed CCR2<sup>RFP</sup> mice showing the CCR2+  
 763 cells distribution in the hypothalamic parenchyma upon AMG487 treatment. 3V = Third ventricle, Scale  
 764 Bars = 50 µm. c) Coronal brain sections from 4 weeks HFD-fed female CCR2<sup>RFP</sup> mice immunostained for  
 765 CXCR3 upon AMG487 treatment. d) Coronal brain sections from 4 weeks HFD-fed male CCR2<sup>RFP</sup> mice  
 766 immunostained for CXCR3 upon AMG487 treatment. 3V = Third ventricle, Scale Bars = 25 µm. e-f)  
 767 Hypothalamic mRNA levels of several chemokine receptors and chemokines in HFD-fed female (light gray  
 768 and pink bars) and male (light gray and blue bars) CCR2<sup>RFP</sup> mice upon AMG487 treatment. For qualitative  
 769 confocal image analysis, we have used 3 samples per group. For RT-qPCR of hypothalamus we have used  
 770 7-8 samples per group. Two-tailed Mann-Whitney tests were used for statistical analyses. \*p<0.05 and  
 771 \*\*p<0.01 in comparison with respective VEH treated groups.

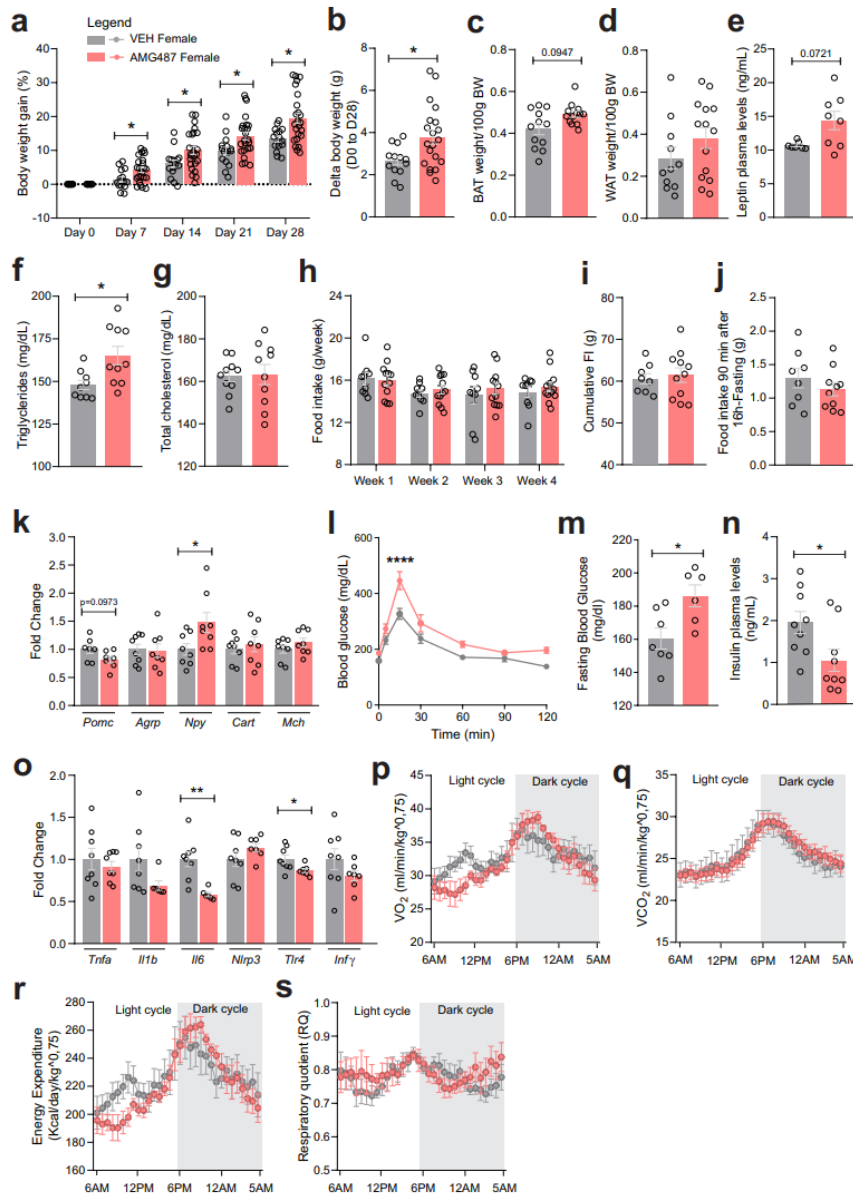

772

773

774 **Figure 11. CXCR3 systemic blockage in HFD-fed female mice.** a) Percentual of body weight gain from Day  
775 0 to Day 28 of the experimental protocol. b) Delta body weight during the experimental period. c) Brown  
776 adipose tissue weight and d) White adipose tissue (retroperitoneal depot) weight at Day 28. e) Leptin, f)  
777 Triglycerides and g) Total cholesterol plasma levels at Day 28. h) Weekly food intake measurement during  
778 experimental period. i) Cumulative food intake during the experimental period. j) 90 min food intake  
779 measurement after 16h-fasting. k) Hypothalamic mRNA levels of neuropeptides involved in food intake  
780 control. l) Intraperitoneal glucose tolerance test at Day 24. m) 6h-fasting blood glucose levels. n) Insulin  
781 plasma levels at Day 28. o) Hypothalamic mRNA levels of inflammatory genes. p) O<sub>2</sub> consumption; q)  
782 CO<sub>2</sub> production; r) Energy Expenditure and s) Respiratory Quotient at Day 24. Data were expressed as  
783 mean ± SEM of 14-16 mice per group (in four independent experiments). To perform qRT-PCR we have  
784 used 8 mice/group. To perform biochemical analysis in plasma we have used 8-10 mice/group. To  
785 perform ipGTT we have used 5 mice/group. To perform indirect calorimetry, we have used 4-5  
786 mice/group. Two-way ANOVA following by Sidak's post-hoc test and Mann-Whitney test were used for  
787 statistical analyses. \*p<0.05, \*\*p<0.01, \*\*\*p<0.001, \*\*\*\*p<0.0001 in comparison with VEH treated  
788 group.

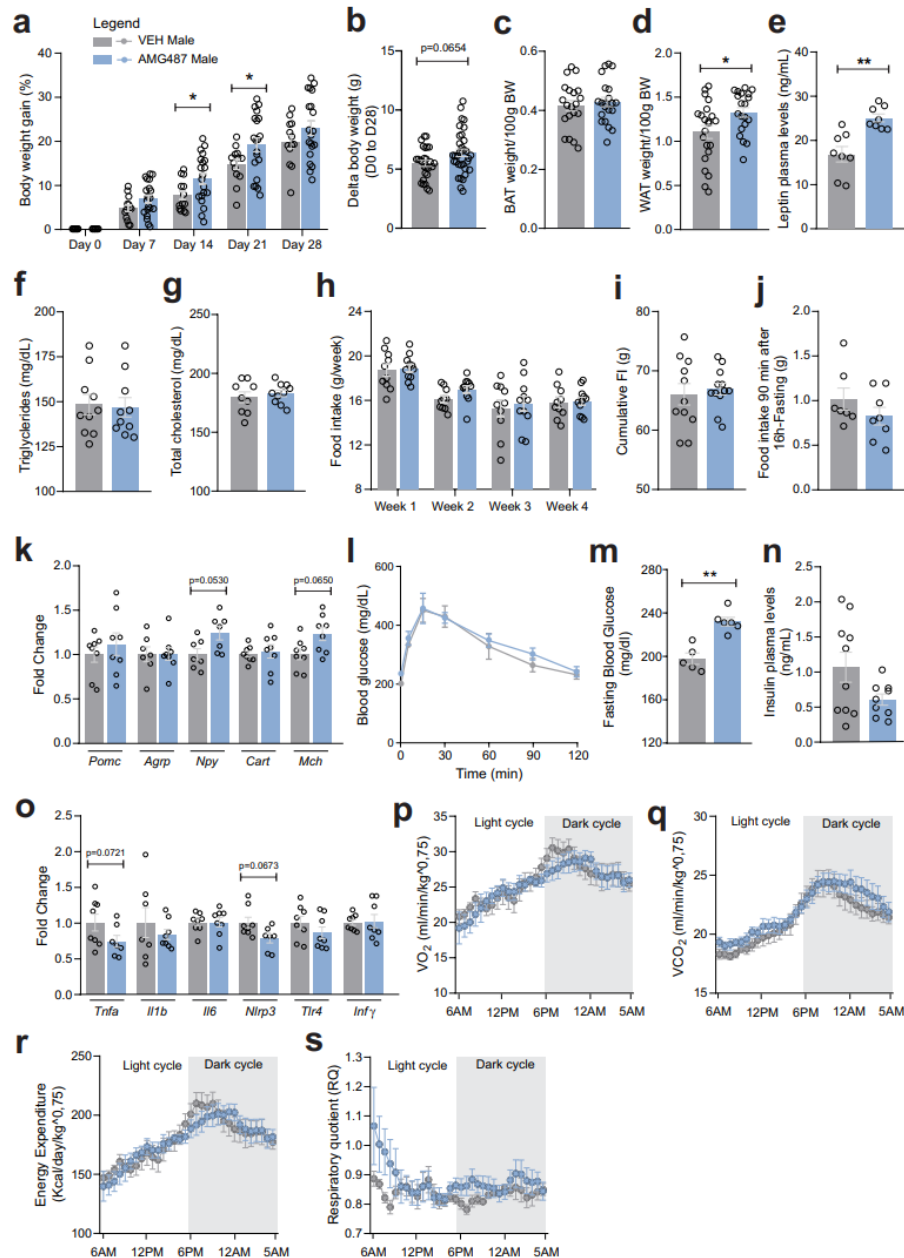

789

790 **Figure 12. CXCR3 systemic blockade in HFD-fed male mice.** a) Percentual of body weight gain from Day 0  
 791 to Day 28 of the experimental protocol. b) Delta body weight during the experimental period. c) Brown  
 792 adipose tissue weight and d) White adipose tissue (retroperitoneal depot) weight at Day 28. e) Leptin, f)  
 793 Triglycerides and g) Total cholesterol plasma levels at Day 28. h) Weekly food intake measurement during  
 794 experimental period. i) Cumulative food intake during the experimental period. j) 90 min food intake  
 795 measurement after 16h-fasting. k) Hypothalamic mRNA levels of neuropeptides involved in food intake  
 796 control. l) Intraperitoneal glucose tolerance test at Day 24. m) 6h-fasting blood glucose levels. n) Insulin  
 797 plasma levels at Day 28. o) Hypothalamic mRNA levels of inflammatory genes. p) O<sub>2</sub> consumption; q)  
 798 CO<sub>2</sub> production; r) Energy Expenditure and s) Respiratory Quotient at Day 24. Data were expressed as  
 799 mean ± SEM of 14-16 mice per group (in four independent experiments). To perform qRT-PCR we have  
 800 used 8 mice/group. To perform biochemical analysis in plasma we have used 8-10 mice/group. To  
 801 perform ipGTT we have used 5 mice/group. To perform indirect calorimetry, we have used 4-5  
 802 mice/group. Two-way ANOVA following by Sidak's post-hoc test and Mann-Whitney test were used for  
 803 statistical analyses. \*p<0.05, \*\*p<0.001, \*\*\*p<0.001, \*\*\*\*p<0.0001 in comparison with VEH treated group
